## Minimal *in vivo* requirements for developmentally regulated

2 cardiac long intergenic non-coding RNAs

4 Matthew R. George<sup>1,2,3,9</sup>, Qiming Duan<sup>1</sup>, Abigail Nagle<sup>1</sup>, Irfan S. Kathiriya<sup>1,2,4</sup>, Yu Huang<sup>1</sup>,  
Kavitha Rao<sup>1</sup>, Saptarsi M. Halder<sup>1,5,6,8</sup>, Benoit G. Bruneau<sup>1,2,3,6,7</sup>

6

1. Gladstone Institutes, San Francisco, CA, 94158 USA

8 2. Roddenberry Center for Stem Cell Biology and Medicine at Gladstone, San Francisco, CA  
94158, USA

10 3. Program in Developmental and Stem Cell Biology, University of California, San Francisco, CA  
94143 USA

12 4. Department of Anesthesia and Perioperative Care, University of California, San Francisco,  
CA 94158

14 5. Division of Cardiology, Department of Medicine, University of California, San Francisco, CA  
94143 USA

16 6. Cardiovascular Research Institute, University of California, San Francisco, CA 94158 USA

7. Department of Pediatrics, University of California, San Francisco, CA 94143 USA

18 8. Present address: Amgen Research, Cardiometabolic Disorders, South San Francisco, CA  
94080 USA

20 9. Present address: Vascugen Inc., Madison, WI, 53719

Correspondence to B.G.B ([benoit.bruneau@gladstone.ucsf.edu](mailto:benoit.bruneau@gladstone.ucsf.edu))

22

24 **Abstract**

26 Long intergenic non-coding RNAs (lincRNAs) have been implicated in aspects of gene  
28 regulation, but their requirement for development needs empirical interrogation. To  
30 begin to understand the roles lincRNAs might play in heart development, we  
32 computationally identified nine murine lincRNAs that have developmentally regulated  
transcriptional and epigenomic profiles specific to early heart differentiation. Six of the  
34 nine lincRNAs had in vivo expression patterns supporting a potential function in heart  
development, including a transcript downstream of the cardiac transcription factor  
*Hand2* that we named *Handlr* (*Hand2*-associated lincRNA), *Rubie*, and *Atcayos*. We  
36 genetically ablated these six lincRNAs in mouse, which implicated genomic regulatory  
roles to four of the cohort. However, none of the lincRNA deletions led to severe cardiac  
phenotypes. Thus, we stressed the hearts of adult *Handlr* and *Atcayos* mutant mice by  
38 transverse aortic banding and found that absence of these lincRNAs did not affect  
cardiac hypertrophy or left ventricular function post-stress. Our results support roles for  
lincRNA transcripts and/or transcription to regulation of topologically associated genes.  
However, the individual importance of developmentally-specific lincRNAs is yet to be  
40 established. Their status as either gene-like entities or epigenetic components of the  
nucleus should be further considered.

42

**Keywords:** heart development, long non-coding RNA, gene regulation

## 44 Introduction

46 A substantial portion of the mammalian genome is transcribed throughout  
development, while only a small fraction of this yields functional protein (Wong, Passey  
et al. 2001, 2012, Hon, Ramilowski et al. 2017). The remaining noncoding RNA is  
48 arbitrarily classified into long (lncRNA) and short transcripts based upon length greater  
or less than 200nt. A few lncRNAs have been implicated to be important for cardiac  
50 development (Grote, Wittler et al. 2013, Han, Li et al. 2014, Kurian, Aguirre et al. 2015,  
Anderson, Anderson et al. 2016). However, these RNA molecules are often products of  
52 the pervasive bidirectional transcription taking place at most genes (Katayama, Tomaru  
et al. 2005), which makes independently dissecting their function difficult. On the other  
54 hand, thousands of putative intergenic lncRNAs (lincRNAs) with little protein coding  
potential exist as stand-alone units (Carninci, Kasukawa et al. 2005). They can exhibit  
56 characteristics indicative of epigenetic control, such as histone H3 trimethylation at  
lysine 4 (H3K4me3) and acetylation of lysine 27 (H3K27Ac) at promoters and  
58 trimethylation at lysine 36 (H3K36me3) throughout their gene body, splicing, 5' m7G  
capping, and polyadenylation (Derrien, Johnson et al. 2012, Sati, Ghosh et al. 2012,  
60 Quinn and Chang 2016). LincRNAs also can display considerable sequence  
conservation and are dynamically expressed in specific tissues at developmentally  
62 discrete times (Diederichs 2014, Perry and Ulitsky 2016, Mattioli, Volders et al. 2019).  
For example, the lincRNAs *Braveheart*, *Meteor*, and *Carmen* seem to play significant  
64 roles in precardiac mesodermal differentiation, at least in cellular differentiation systems  
*in vitro* (Klattenhoff, Scheuermann et al. 2013, Ounzain, Micheletti et al. 2015,

66 Alexanian, Maric et al. 2017, Hou, Long et al. 2017). However, *Meteor* knockout *in vivo*  
resulted in milder phenotypes than observed *in vitro* (Guo, Xu et al. 2018), while  
68 *Braveheart* and *Carmen* have not been tested in embryos. Thus, few lincRNAs have  
been shown to be required for cardiac development *in vivo*. The energy investment a  
70 cell puts toward the processing and maintenance of these transcripts suggests their  
putative importance to the cell and organism. Therefore, efforts must be taken to  
72 interrogate specific lincRNA requirements for proper embryogenesis.

We were most interested in lincRNAs that might act to influence the early  
74 commitment of nascent mesoderm into the cardiac lineage. We hypothesized that as-  
yet unstudied transcripts were important for this most fundamental stage of cardiac  
76 development. Therefore, we screened for the expression of candidates during mouse  
embryonic stem cell (mESC) *in vitro* differentiation into cardiomyocytes (CM) through  
78 nascent mesoderm (MES), cardiac mesoderm (cMES), and cardiac progenitor (CP)  
intermediates. Of more than 114,000 long noncoding RNA annotations, we identified a  
80 small cohort of lincRNAs with epigenetic regulation, clear splice structure, and cardiac  
progenitor specificity, which we then validated *in vivo* in the early embryo. Ablation of  
82 these noncoding genes revealed regulatory roles within their topologically associated  
domains (TADs) but very mild or undetectable phenotypes in heart development or  
84 postnatal function.

86

## Results

88 *LincRNAs with cardiac-specific expression and epigenetic regulation in vitro.*

We hypothesized that, like many canonical genes, a subset of lincRNAs would  
90 be specifically expressed in the cardiac lineage. We also predicted that those most  
critical for heart formation would function early in its development. To find candidate  
92 lincRNAs, we re-mapped stranded raw RNA-seq reads from differentiations of mouse  
ESCs into cardiomyocytes (Figure 1A/B; (Wamstad, Alexander et al. 2012, Devine,  
94 Wythe et al. 2014) against Noncode version 4.0-annotated transcripts (Xie, Yuan et al.  
2014). Additionally, we integrated parallel histone modification ChIP-seq data  
96 (Wamstad, Alexander et al. 2012) to discriminate loci under epigenetic regulation. To  
screen for cardiac developmental specificity, we chose to focus on elements that were  
98 lowly expressed in ESCs (FPKM < 0.5), while strongly upregulated in cardiac mesoderm  
or cardiac progenitors (FPKM >1.0). The majority of protein coding genes display  
100 antisense transcription from their promoters (Carninci, Kasukawa et al. 2005), including  
numerous studied lincRNAs (Kino, Hurt et al. 2010, Grote, Wittler et al. 2013, Han, Li et  
102 al. 2014, Kurian, Aguirre et al. 2015, Ramos, Andersen et al. 2015, Anderson, Anderson  
et al. 2016, Daneshvar, Pondick et al. 2016, Gore-Panter, Hsu et al. 2016, Xu, Zhang et  
104 al. 2016). We focused instead on genomic elements that could be altered independently  
from their nearby protein-coding genes. Therefore, we filtered for RNA annotations  
106 whose transcriptional start site (TSS) began more than 1 kilobase (kb) from the TSS of  
known protein-coding genes. To avoid spurious transcripts, we required candidates be  
108 spliced and then further refined the list to those displaying histone H3 lysine-4

trimethylation (H3K4me3) and H3 lysine-27 acetylation (H3K27Ac) at their promoters.

110 After removing annotated transcripts that splice into nearby protein coding genes (i.e.  
A930006K02Rik into *Irfar1*), we found that these criteria narrowed candidates to only  
112 nine total lincRNAs out of 114,104 considered transcripts (Figure 1B).

The lincRNA *Rubie* (**R**na **U**pstream **B**mp4 in the **I**nnear **E**ar, Gm15219) was  
114 known to co-express with *Bmp4* after E15.0 in the mouse inner ear, and its perturbed  
splicing was previously implicated in ear vestibule malformation and consequent circling  
116 behavior (Roberts, Abraira et al. 2012). However, our candidate screen revealed it to be  
expressed much earlier in the developing cardiac mesoderm (Figure 2A). As in the inner  
118 ear, its expression *in vitro* overlapped the TGF- $\beta$  signaling protein *Bmp4* (Wozney,  
Rosen et al. 1988) and these genes, separated by approximately 176kb, co-occupied a  
120 strongly interacting region within the same topologically associated domain (TAD;  
Figure 2C) (Dixon, Selvaraj et al. 2012, Nora, Lajoie et al. 2012).

122 *Hand2*, a transcription factor critical for heart development (Srivastava, Thomas  
et al. 1997), was previously shown to be regulated by antisense transcription of the  
124 noncoding RNA *Upperhand* (*Uph*) locus 5' from its promoter (Anderson, Anderson et al.  
2016). Our search identified *5033428122Rik* as a candidate lincRNA approximately 8 kb  
126 downstream of *Hand2*, which we named *Handlr* (Hand2-Associated lincRNA). During  
the course of our study, others also studied this gene in the cardiac lineage, which they  
128 named *Handsdwn* (*Hdn*) (Ritter, Ali et al. 2019). This region displayed numerous  
transcribed splice forms, but 3' rapid amplification of cDNA ends (RACE) of E9.5 cDNA  
130 revealed a single predominant 5-exon, polyadenylated isoform that varied from its

Ensembl- and RefSeq-annotated structures (Figure 1D, Supplemental figure S1A, S1B).

132 *Handlr*'s expression overlapped *Hand2* *in vitro* (Figure 2E), but these genes sat near a  
TAD border (Figure 2F) and were separated by a CTCF insulation site (Martin, Pantoja  
134 et al. 2011), suggesting a potential topological division between the two.

Seven additional annotated lincRNAs met the criteria for subsequent analyses.

136 We discovered *Atcayos* (*2310050B05Rik*) transcription to span the important  
cardiomyocyte metabolic regulator *Nmrk2* (Diguët, Trammell et al. 2018) and precede  
138 its expression in differentiating cardiac progenitors and cardiomyocytes (Supplemental  
figure S2A, S2B). *Gm12829*, named *HrtLincR4* (heart lincRNA of chromosome 4) was  
140 correlatively expressed within a genomic domain in frequent contact with *Trabd2b*, a  
Wnt protein-binding metalloprotease (Zhang, Abreu et al. 2012). In addition, its  
142 expression was only transiently detected within an 18-hour window at the cardiac  
mesoderm (cMES) stage of differentiation (Supplemental figure S2C-S2E). Also,  
144 *E130006D01Rik*, named *HrtLincR5* (heart lincRNA of chromosome 5), was expressed  
within a *Mn1*-interacting DNA domain approximately 275kb downstream of this  
146 transcriptional coactivator (van Wely, Molijn et al. 2003). This transcript displayed highly  
stereotypic splicing and was only detected at the cardiac progenitor stage of  
148 differentiation (Supplemental figure S3A-S3C). *C430049B03Rik*, named *HrtLincRX*  
(heart lincRNA of X chromosome) was highly expressed early in our differentiation  
150 model and contained a miRNA cluster in its 3' tail that had previously been shown to  
drive cardiomyocyte specification (Shen, Soibam et al. 2016). This lincRNA also lies  
152 approximately 12.5kb downstream of- and overlapped expression with- the essential

placental gene *Plac1* (Jackman, Kong et al. 2012) not normally expressed in most  
154 somatic tissues (Fant, Farina et al. 2010) (Supplemental figure S2D-S2F). Finally,  
*5033406O09Rik*, *9630002D21Rik*, and *2810410L24Rik* also fulfilled the criteria of our  
156 screen (Supplemental figure S4A-S4C).

All nine lincRNAs contained regions with highly homologous sequence to human  
158 and/or mammalian genomes (Figure 2, Supplemental figures S2-S4). To assess the  
protein coding potential of these candidates, we employed multiple tests. First, we  
160 evaluated PhyloCSF (Lin, Jungreis et al. 2011) codon scores in all three frames for  
each transcript. Whereas this algorithm readily detected stretches with coding potential  
162 in known genes such as *Bmp4* and the micropeptide-containing *Apela/Toddler* (Pauli,  
Norris et al. 2014) and *Dwarf* (Nelson, Makarewich et al. 2016), we found no evidence  
164 for protein coding potential in our lincRNA cohort, with one exception. A 28 amino acid  
reading frame in the second exon of *HrtLincR4* was predicted to represent a possible  
166 conserved coding region (Supplemental figure S5A), though *HrtLincR4*, as well as each  
additional member of the cohort displayed negative coding-non-coding indices (CNCI,  
168 Supplemental figure S5B) (Sun, Luo et al. 2013) similar to the known paraspeckle-  
associated lincRNA *Neat1* (Hutchinson, Ensminger et al. 2007). However, CPAT  
170 (Wang, Park et al. 2013) calculation of hexamer usage bias (Wang, Park et al. 2013)  
and Fickett nucleotide composition and codon usage bias (Fickett 1982) could not  
172 differentiate our lincRNA group from *Apela* or *Dwarf* (Supplemental figure S5C). We  
next tested *Rubie*, *Handlr*, *Atcayos*, *HrtLincR4*, *HrtLincR5*, and *HrtLincRX* localization in  
174 fractionated cardiac progenitor cells. These lincRNAs were biased to the nucleus, where



*Rubie* and *Handlr* were enriched even more so than *Neat1* (Supplemental figure S5D).

176 Additionally, these six lincRNAs could generate cDNA using oligo dT primers at least as  
efficiently as *Actb* and *Neat1*, known to be polyadenylated (Sasaki, Ideue et al. 2009)  
178 (Supplemental figure S5E, Supplemental table S1). Taken together, we classified these  
lincRNAs as nuclear-enriched, polyadenylated, transcripts with little translational  
180 capacity. However, we could not rule out the coding potential of the minority *HrtLincR4*  
fraction that reaches the cytoplasm.

182

*A cohort of screened cardiac lincRNAs display dynamic expression in vivo in the*  
184 *developing mouse heart.*

We examined the spatiotemporal expression patterns in the developing embryo  
186 for each of the nine candidate lincRNAs by whole mount *in situ* hybridization from E7.25  
through E10.5 using transcript-specific probes (Supplemental table S2). The expression  
188 patterns observed *in vitro* were largely predictive of those observed *in vivo*. *Rubie* was  
first observed in the E7.75 embryo, where, similar to *Bmp4* (Perea-Gomez, Shawlot et  
190 al. 1999), it strongly demarcated the extraembryonic boundary and flanked the eventual  
heart field. From E8.0 to E8.5, its expression became less focused, spreading  
192 throughout the developing cardiac crescent and heart tube, respectively. *Rubie*  
transcription at E8.75 was largely non-cardiac, and by E9.5, it was strongly localized to  
194 posterior mesoderm and the otic vesicle (Figure 3A). This patterning overlapped a  
somewhat refined subset of what had previously been established for *Bmp4* (Danesh,  
196 Villasenor et al. 2009).

From E8.5 through E9.5, *Handlr* was transcribed in the developing heart tube,  
198 posterior cardiac progenitors, branchial arches, and lateral plate mesoderm (Figure 3B).  
These patterns overlapped what was also shown for *Hand2* at this developmental stage  
200 (Charite, McFadden et al. 2000), suggesting common regulation between *Hand2* and  
*Handlr*. *Atcayos*, as predicted by *in vitro* expression patterns, was weakly expressed  
202 during early stages of heart tube formation, while it was dramatically upregulated after  
E9.5 in the developing ventricles, as well as cranial structures and somitic mesenchyme  
204 (Figure 3C).

From E8.25 through E9.5, *HrtLincR4* displayed strong expression in developing  
206 pharyngeal mesoderm, just dorsal to the developing cardiac crescent (Figure 3D).  
Given its highly transient expression within differentiating cardiac mesoderm *in vitro*,  
208 these data suggested *HrtLincR4* to be quickly specified to the secondary heart field  
and/or adjacent tissues during the onset of cardiac lineage commitment. *HrtLincR5* was  
210 broadly expressed throughout the mesoderm, including the nascent cardiac crescent, at  
E8.25. As expected by its short-lived *in vitro* expression pattern, *HrtLincR5* was  
212 predominantly lost *in vivo* by E9.5 (Figure 3E).

*HrtLincRX* was strongly expressed by E7.5 during cardiac lineage formation in  
214 anterior mesoderm at the extraembryonic boarder, as well as in extraembryonic tissues.  
At E8.25, it was strongly expressed in the cardiac crescent, amniotic membranes, and  
216 the developing allantois. While expression of the adjacent *miR322/503* cluster was  
previously shown to be cardiac-specific (Shen, Soibam et al. 2016), this lincRNA was  
218 widely expressed throughout the heart, forelimb, and somitic mesoderm at E9.5 and

E10.5 (Figure 3F). This suggested divergent regulation and/or compounding roles for  
220 *HrtLincRX* versus its miRNA components. We could not effectively validate the  
expression of *5033406O09Rik*, *9630002D21Rik*, or *2810410L24Rik* beyond diffuse, low  
222 levels in the developing mouse embryo (Supplemental figure S6A-S6C). These  
experiments established the striking expression patterns of numerous tissue-specific  
224 lincRNAs identified from our screen of *in vitro* cardiac differentiation. Therefore, we  
aimed to test developmental importance of *Rubie*, *Handlr*, *Atcayos*, *HrtLincR4*,  
226 *HrtLincR5*, and *HrtLincRX* expression during embryonic development.

228 *Cas9* ablation of lincRNA promoter regions *in vivo* identifies local gene regulatory roles.

To determine the requirement for the six lincRNAs that displayed compelling *in*  
230 *vivo* expression, we generated knockout mouse lines through pronuclear Cas9 mRNA  
and tru-sgRNA (Fu, Sander et al. 2014) injections. For each knockout, paired tru-  
232 sgRNAs were co-injected to induce 2-3kb deletions flanking the respective lincRNA  
transcriptional start site (TSS) (Figure 4A, Supplemental table S3), which successfully  
234 generated heritable alleles for all six target regions. After substantial outbreeding (> 3  
backcrosses into C57Bl/6j background), we crossed heterozygotes and harvested the  
236 anterior half of E8.25 embryos for RT-qPCR (Figure 4B). We found that these deletions  
ablated downstream transcription of each lincRNA (Figure 4C-4H). As these lincRNAs  
238 were nuclear-enriched, we hypothesized they might be involved in transcriptional  
regulation within their local genomic environments. To test this, we measured  
240 expression of neighboring protein-coding genes sharing the same respective TADs

(Supplemental table S1). While *Rubie* was previously associated with BMP4 signaling in  
242 the inner ear (Roberts, Abraira et al. 2012), its requirement for *Bmp4* expression had  
not been established. We found that loss of *Rubie* resulted in significant reduction of  
244 *Bmp4* expression during cardiac specification. Furthermore, the amount of transcribed  
*Rubie* was directly correlated with *Bmp4* levels in this region at the same time point.  
246 This effect was maintained even within equivalent underlying genotypes, whereby *Rubie*  
and *Bmp4* transcript levels were still significantly correlated among *Rubie*<sup>+/-</sup> offspring  
248 only (Figure 4C). These data strongly suggested that either the act of *Rubie*  
transcription and/or its physical RNA molecule were responsible for quantitative  
250 regulation of *Bmp4* expression.

Despite proximity to and co-expression with *Handlr*, *Hand2* activation was not  
252 dependent on *Handlr* lincRNA (or its underlying promoter DNA sequence, Figure 4D).  
We speculated that the TAD architecture and CTCF boundary between these genes  
254 may introduce complex dynamics within the region. We also could not find a correlation  
between *Mn1*'s expression to *HrtLincR5* (Figure 4E). In contrast, *Nmrk2* and *Trabd2b*  
256 expression was dependent on *Atcayos* (Figure 4F) and *HrtLincR4* (Figure 4G),  
respectively. Furthermore, *Plac1* transcription was significantly and inversely correlated  
258 to *HrtLincRX* levels, whereby loss of *HrtLincRX* resulted in approximately a 2-fold  
increased expression of *Plac1* (Figure 4H). However, using IntaRNA (Mann, Wright et  
260 al. 2017) analysis, we calculated stable RNA-RNA interactions between all three  
miRNAs constituents of its 3' tail (miRNA-322, miRNA-351, miRNA-503) and the 5'- and  
262 3'-untranslated regions (UTRs) of *Plac1* (Figure 4I). Therefore, this relationship could

likely be explained by the loss of inhibitory miRNA binding to *Plac1* primary transcript.

264 Nonetheless, these data indicated a potential role for *HrtLincRX* and/or its miRNAs in  
demarcating embryonic from extraembryonic mesoderm during gastrulation and early  
266 cardiogenesis.

268 *Cardiac lincRNAs are not required for viable mouse development.*

To determine the requirement of our lincRNA cohort for viable embryonic  
270 development *in vivo*, we bred heterozygotes for each gene and examined ratios of  
expected offspring that survived to weaning (Supplemental table S4). We could not  
272 establish any reduction in viability within null progeny for any tested lincRNA (Figure 5A,  
5C, 5D, Supplemental figure S7A-S7C). Furthermore, homozygous offspring for these  
274 loci lived to adulthood and were fertile. However, the *Rubie* null genotype did  
sporadically recapitulate the circling behavior described by Roberts et al, which they  
276 observed as a result of aberrant *Rubie* splicing in the SWR/J genetic background  
(Roberts, Abraira et al. 2012). While rarely observed, circling was only present in *Rubie*<sup>-/-</sup>  
278 mice during >2 years of colony breeding (Figure 5B). Nonetheless, despite their clear  
expression within the developing heart, we concluded that none of the lincRNAs were  
280 individually required for viable development or fertility in the FVBn; C57BL/6j mixed  
background.

282

*Neither Handlr nor Atcayos play important roles in the cardiac stress response.*

284 Gene knockout models often require external stressors to materialize overt

phenotypes. *Handlr* and *Atcayos* were the only cohort lincRNAs expressed in adult  
286 hearts, and *Atcayos*' very high expression was reduced approximately 50% after  
transverse aortic constriction (TAC)-induced cardiac hypertrophy (Supplemental figure  
288 S7D, S7E) (Duan, McMahon et al. 2017). Therefore, we performed TAC experiments on  
*Handlr*- and *Atcayos*-null mice and compared their responses to wild type (WT)  
290 littermates. At baseline, calculated left ventricular (LV) masses (from echocardiographic  
measurements) were modestly reduced in *Handlr*<sup>-/-</sup> and *Atcayos*<sup>-/-</sup> adults (-18.4%,  $p <$   
292 0.05; -22.4%,  $p < 0.01$ , respectively; Figure 5E; Supplemental table S5 and S6).  
Additionally, *Handlr*-null adults had slightly but significantly increased fractional area  
294 contractility (FAC) over *Handlr*<sup>+/+</sup>, *Atcayos*<sup>+/+</sup>, and *Atcayos*<sup>-/-</sup> genotypes (46.5%, versus  
37.8%,  $p < 0.01$ ; 37.4%,  $p < 0.005$ ; and 40.1%,  $p < 0.05$ , respectively; Figure 5F,  
296 Supplemental table S5/S6). However, neither loss of *Handlr* nor *Atcayos* could invoke a  
significant alteration to LV mass increase or LV fractional shortening decrease after  
298 TAC-mediated stress. Of note, the severity of the TAC-response in *Handlr*-related  
experiments was greater than that for *Atcayos* due to genetic background and/or  
300 surgical procedure differences for each cohort. This resulted in sharper fractional  
shortening decrease and longer duration under cardiac failure (%FAC < 30%) for these  
302 mice. Consequently, *Handlr*<sup>+/+</sup> males displayed greater downstream increase in lung  
mass versus *Handlr*<sup>-/-</sup> individuals (whom began the experiment with greater contractile  
304 function), while only sporadic lung hypertrophy arose in the *Atcayos* groups (Figure 5G-  
5J). This result was not interpreted to indicate an altered cardiac hypertrophic response  
306 in *Handlr*-null individuals but further supports their increased LV FAC measured at

baseline. We also could not detect any noticeable changes versus WT in the expression  
308 of canonical hypertrophic response genes *Nppa*, *Nppb*, or *Acta1* due to *Handlr* nor  
*Atcayos* knockout (data not shown). Therefore, despite strong *Atcayos* expression in the  
310 adult heart and the known hypertrophic involvement of *Handlr*'s neighbor *Hand2*, loss of  
these transcripts did not induce an altered response to LV pressure overload.  
312 Therefore, we concluded that neither of these lincRNAs played important roles in the  
physiological response to heart failure.

314

*Compound heterozygosity reveals genetic interaction between Rubie and Bmp4 but not  
316 between Handlr and Hand2.*

Despite the lack of overt lethality in lincRNA-deficient offspring, we carefully  
318 examined morphological heart development in *Handlr* and *Rubie* null embryos, the only  
conditions that produced noticeable physiological effects. We harvested E15.5 hearts  
320 and examined transverse histological sections to establish any change to chamber  
septation, myocardial trabeculation and/or compaction, or ventricular outflow tract (OFT)  
322 development. *Handlr*<sup>-/-</sup> adults exhibited increased left ventricular fractional shortening  
over WT controls, but we could not associate this functionality with overt changes in  
324 cardiac anatomy (Supplemental figure S8A, S8B). Due to overlapping expression  
patterns between *Hand2* and *Handlr* in the developing heart, we next tested embryos  
326 from *Hand2*<sup>+/-</sup> x *Handlr*<sup>+/-</sup> crosses to eliminate one allele of either *Hand2* or *Handlr* per  
chromosome. However, neither *Hand2* heterozygosity nor *Hand2*<sup>+/-</sup>; *Handlr*<sup>+/-</sup>  
328 compound heterozygosity resulted in any clear effects on heart morphogenesis

(Supplemental figure S8C, S8D). In addition, we did not notice any elevated lethality in  
330 *Hand2<sup>+/-</sup>;Handlr<sup>+/-</sup>* offspring (data not shown, n = 63).

*Bmp4* expression in the embryo was correlated to the amount of *Rubie* transcript.  
332 Numerous studies have established the requirement of proper BMP4 dosage for normal  
septation of the atria, ventricles, and outflow tract (OFT), as well as viable embryo  
334 development (Dunn, Winnier et al. 1997, Jiao, Kulesa et al. 2003, Goldman, Donley et  
al. 2009). Therefore, we tested the hypothesis that compound haploidy of *Bmp4* and  
336 *Rubie* together would result in an exacerbated onset of resulting phenotypes. For this,  
we bred *Bmp4<sup>fl/fl</sup> x Rubie<sup>+/-</sup>; Actb-Cre<sup>+</sup>* (single transgene integration) in the FVB/n;  
338 C57BL/6j mixed genetic background. When we examined E15.5 hearts, neither the  
*Rubie<sup>-/-</sup>* background nor loss of a single *Bmp4* allele could induce an abnormal cardiac  
340 phenotype. We also recovered these offspring in expected ratios at weaning (Figure 6A-  
6D). However, we did find a sustained approximately 20% reduction in recovered pups  
342 carrying the *Bmp4<sup>+/-</sup>/Rubie<sup>+/-</sup>* compound genotype (Figure 6D; n = 186). In addition,  
these offspring exhibited incidences of OFT distortion out of the right ventricle beyond  
344 its typical boundary. In these cases, the origins of the pulmonary artery skewed toward  
the left ventricular OFT and aortic valve (Figure 6E). While we were unable to clearly  
346 establish communication between the pulmonary and aortic outflow systems in these  
instances, the data point toward a modest genetic interaction between *Rubie* and *Bmp4*  
348 in cardiac morphogenesis.



## Discussion

350           With thousands of uncharacterized noncoding transcriptional elements  
expressed throughout the genome, efforts must be taken to better understand the  
352 functional relevance of unstudied lincRNAs. Towards this need, these experiments were  
meant to identify and test the requirement for cardiac progenitor-specific lincRNAs in the  
354 developing embryo. Out of numerous considered annotated lincRNAs that we initially  
surveyed, our selection criteria led to a highly restricted set that contained  
356 epigenetically-regulated promoter signatures and cardiac-specific expression *in vivo*.  
Ablation of these transcripts in the developing mouse revealed modulatory roles of  
358 *Rubie*, *Atcayos*, *HrtLincR4*, and *HrtLincRX* within their local genomic environments. In  
particular, we found a requirement for the *Rubie* locus for normal *Bmp4* dosage.  
360 Furthermore, loss of *Handlr/Hdn* and *Atcayos* led to minor reduction in LV mass in adult  
mice, along with modestly increased contractility among *Handlr*<sup>-/-</sup> individuals. Loss of  
362 either of these two transcripts did not influence the hypertrophic or LV contractile  
response to pressure overload. Most importantly, despite clear transcription in the  
364 developing heart, none of the tested lincRNAs alone were required for embryo viability.  
However, when we generated compound heterozygotes for *Rubie* and *Bmp4*, we  
366 observed a slight yet consistent reduction in recovered offspring and a modest  
perturbation of right ventricular outflow tract orientation. Of course, this cohort of  
368 lincRNAs that we ablated does not include the entirety of all relevant cardiac transcripts.  
Nonetheless, we argue this set of transcripts represents a sufficient consideration of the  
370 early cardiac lincRNA landscape to predict modest individual roles for most noncoding

transcripts of this type.

372            Similar to our observations, an independent study (Ritter, Ali et al. 2019) reported  
that the *Handlr/Hdn* locus produced multiple transcripts. Namely, *Hdn* was described as  
374 originating from the same TSS but splicing approximately 15kb 3' beyond *Handlr*, along  
with *Hdn $\alpha$* , which shares TSS and splice patterning (albeit 1 fewer exon) with *Handlr*.  
376 *Hdn/Hdn $\alpha$*  was described as localized to the cytoplasm near the nuclear envelope. Our  
results clearly supported *Handlr* enrichment in the nucleus, though we did not  
378 interrogate to which subnuclear component. Most importantly, they showed that  
complete deletion of the >20 kilobase *Hdn* locus produced embryonic-lethal cardiac and  
380 extraembryonic phenotypes. This accompanied perturbation of a cardiac gene  
expression program, including hyper-expression of *Hand2*. They attributed the act of  
382 transcription from the *Hdn/Hdn $\alpha$*  TSS as an important regulatory component of this  
phenotype, whereas *Hdn( $\alpha$ )*-specific RNA molecules were dispensable. In our work,  
384 ablation of the *Handlr/Hdn/Hdn $\alpha$*  TSS, which terminated downstream transcription,  
resulted in no lethality, dramatic cardiac phenotype, or altered *Hand2* expression.  
386 Therefore, both sets of experiments agree on the lack of requirement for *Handlr/Hdn $\alpha$*   
as a functional lincRNA during cardiogenesis, but disagree on a link between  
388 *Handlr/Hdn/Hdn $\alpha$*  transcription and *Hand2* expression. Importantly, a clear regulatory  
mechanism/effect for transcription per se from the *Handlr/Hdn/Hdn $\alpha$*  TSS has yet to be  
390 established. We predict the large genomic deletion reported in Ritter *et al.* 2019 affects  
critical cardiac enhancer elements within the *Hdn* locus. Therefore, future work must  
392 more definitively assign a mechanistic role for RNA synthesis, splicing, and/or molecular

function at this locus before attributing them to the mild or severe phenotypes observed  
394 by either study.

The subtle effects created by ablation of our collection of cardiac lincRNAs are  
396 consistent with the results most often obtained by others' efforts to knockout  
developmentally-specific lincRNAs (Nakagawa, Naganuma et al. 2011, Nakagawa, Ip et  
398 al. 2012, Zhang, Arun et al. 2012, Sauvageau, Goff et al. 2013, Goff, Groff et al. 2015,  
Lai, Gong et al. 2015, Amandio, Necsulea et al. 2016, Goudarzi, Berg et al. 2019). In  
400 most instances where strong phenotypes have been observed, conflicting regulatory  
mechanisms, *in vivo* versus *in vitro* effects, lack of *in vivo* reproducibility, and/or  
402 conflated DNA-/RNA-/transcription-/splicing-based mechanisms prevent clean parsing  
of the underlying importance of lincRNA molecules. However, several lincRNAs in our  
404 cohort did seem to function within the nucleus to impact gene expression in their local  
environments, including *Rubie's* influence on *Bmp4*. Consequently, future experiments  
406 are needed to dissect the physical mechanisms that underlie these effects. We  
speculate that the vast majority of singular lincRNAs fit as cogs into the multifaceted  
408 regulatory architecture of the nucleus, which individually can be compensated for during  
organogenesis *in vivo*. More so we hypothesize that overt phenotypic impacts in most  
410 lincRNA-centric experiments will be observed only after additional contextual molecular  
components are also manipulated. It may prove more beneficial to interpret most  
412 nuclear lincRNAs as collective epigenomic components analogous to histone/DNA  
modifications- with potential capabilities to alter the physical properties and orientation  
414 of the genome and recruit regulatory machinery, more so than as individual gene-like

elements.

416

### **Author Contributions**

418

Project design and direction: B.G.B. and M.R.G. All experiments: M.R.G., except mouse  
420 echocardiography and surgery: Q.D., Y.H. under supervision of S.M.H, QRT-PCR: A.N.,  
and interpretation of cardiac anatomy: I.S.K and K.R. Manuscript writing: M.R.G. and  
422 B.G.B with contribution from all authors.

### **Acknowledgements**

424  
426 We thank Junli Zhang (Gladstone Transgenic Core) for pronuclear injection, Hazel  
Salunga for help with echocardiography, and the Gladstone Histology and Microscopy  
428 Core for embryo heart sectioning and histology. We are also grateful to Judy Morgan,  
Leslie Goodwin, and Laura Reinholdt (JAX) for mouse production.

430

### **Funding**

432

This work was funded by NIH/NHLBI (R01HL114948 and Bench to Bassinet Program  
434 UM1HL098179) to B.G.B., NIH/NHLBI HL127240 to S.M.H, and a Graduate Scholarship  
co-sponsored by the American Heart Association and the Lawrence J. and Florence A.  
436 DeGeorge Charitable Trust (ID: 15PRE24470159) to M.R.G. I.S.K. was funded by the

Society of Pediatric Anesthesia, UCSF Research Allocation Program, the Hellman  
438 Family Fund, and the Department of Anesthesia at UCSF. This work was also  
supported by an NIH/NCRR grant (C06 RR018928) to the J. David Gladstone Institutes  
440 and by The Younger Family Fund to B.G.B.

442 **Competing Interests:** B.G.B is a co-founder of and owns equity in Tenaya  
Therapeutics. M.R.G. is an employee of and owns equity in Vascugen Inc. S.M.H. is an  
444 executive and shareholder of Amgen, Inc. and a co-founder with equity stake in Tenaya  
Therapeutics. These interests are not related to the work described here.

446

## Materials and Methods

### 448 *Informatic search for cardiac lincRNAs*

Raw stranded, total RNA-seq reads from ESC (day 0), MES (day 4), CP (day  
450 5.3), and CM (day 10) stages (Wamstad, Alexander et al. 2012) and cMES (day 4.75)  
stage (Devine, Wythe et al. 2014) of mESC *in vitro* differentiation into cardiomyocytes  
452 were mapped to the mouse genome (mm9) and aligned to Noncode v4 (Xie, Yuan et al.  
2014) annotated lincRNAs using the Cufflinks suite of software (Trapnell, Williams et al.  
454 2010). ChIP-seq domains positive for trimethylation of histone 3 lysine 4 (H3K4me3),  
acetylation of histone 3 lysine 27 (H3K27Ac), and trimethylation of histone 3 lysine 27  
456 (H3K27me3) for ESC, MES, CP, and CM stages were obtained from Wamstad,  
Alexander et al. The following criteria were used to generate a candidate list of  
458 lincRNAs. 1.) Less than 0.5 fragments per kilobase per million reads (FPKM) in mESCs.  
2.) Greater than 1.0 FPKM at CP or cMES stage of differentiation (expression at other  
460 time points was not factored into selection). 3.) Positive H3K4me3 ChIP-seq signal at  
TSS during CP stage. 4.) Positive H3K27Ac at TSS during CP stage. 5.) At least 1 exon  
462 splice in transcript. 6.) No splice events into neighboring protein coding genes 7.) TSS  
at least 1kb from nearest protein-coding gene TSS. Screened candidates tracks were  
464 then visually inspected via UCSC Genome Browser (Kent 2002) to filter for lincRNAs  
with expression patterns that matched the assigned lincRNA structure and not simply  
466 spurious reads at the general locus.

### 468 *Analysis of lincRNA coding potential*

PhyloCSF (Lin, Jungreis et al. 2011) browser tracks were uploaded to the UCSC

470 Genome Browser for interrogation. Fickett and hexamer scores were calculated with  
CPAT software (Wang, Park et al. 2013) and visualized with the 'ggplot2' package  
472 (Wickham 2016) in R version 3.4.0 (R-Core-Team 2017). CNCI scores were obtained  
from NONCODEv4 annotations (Xie, Yuan et al. 2014).

474

*mESC differentiation and cardiac progenitor cell fractionation*

476 Directed cardiomyocyte differentiations were performed as previously described  
(Wamstad, Alexander et al. 2012) using the *Smarcd3-F6nlsEGFP* mESC line (Devine,  
478 Wythe et al. 2014) with minor modifications to improve differentiation efficiency. Briefly,  
three days before differentiation induction (day -3), mESCs were split into 2i + LIF  
480 media on gelatin. The following day (day -2), 2i + LIF was replaced with 15% FBS  
(HiClone) in DMEM + 1X non-essential amino acids + 1X sodium pyruvate + 1X  
482 GlutaMAX + 1X  $\beta$ mercaptoethanol + 1X penicillin/streptomycin + 1000U/ml LIF  
(ESGRO, EMD). The following day (day -1), cells were fed again with the same 15%  
484 FBS-LIF media to complete their conversion to epiblast-like stem cells. One day later  
(day 0), cardiac differentiation was initiated as per Wamstad, Alexander et al. On day  
486 5.3, CP cells were dissociated with TrypLE (Gibco) and quenched in DMEM:F12  
(Gibco) + 10% FBS (HiClone). After washing in D-PBS, nuclei were isolated using the  
488 Nuclei EZ Prep kit (SigmaAldrich), pelleted, and supernatant was collected as  
cytoplasmic fraction. Nuclei were washed again, and pellet was harvested with Trizol  
490 (Invitrogen) as nuclear fraction in subsequent qPCR quantification experiments.

Cytoplasmic fractions were processed equivalently.

492

*Whole mount in situ hybridization*

494 Primers were designed to amplify *in situ* probe templates between 440bp and  
1.5kb for each candidate lincRNA off cDNA from CP stage of *in vitro* differentiation  
496 (Supplemental table S2). Templates were electrophoresed in 1.0% agarose gel and  
purified using QIAquick gel extraction kit (Qiagen). These templates were then TOPO  
498 TA cloned into pCR4-TOPO using the TOPO TA cloning kit (Invitrogen) and Sanger  
sequenced to validate orientation in plasmid and proper composition. 2 $\mu$ g linearized  
500 vector for each lincRNA template were then input into digoxigenin (DIG) RNA synthesis  
kit reactions (Roche) in 40 $\mu$ L total volume using either T7 or T3 primers, depending on  
502 template orientation. Transcription was carried out for 2 hours at 37°C. Afterward, 8U  
DNase I (NEB) were added to each reaction and incubated for 15 min at 37°C to  
504 degrade DNA. DNase reactions were quenched with 1.5 $\mu$ L EDTA, and DIG-RNA probes  
were cleaned and concentrated with RNeasy Mini Columns (Qiagen), EtOH precipitated  
506 and washed, and resuspended in 20 $\mu$ L H<sub>2</sub>O. DIG probes were then diluted to 100 $\mu$ g/mL  
in HYB buffer (50% formamide + 5X SSC pH 4.5 + 50 $\mu$ g/mL yeast tRNA + 75 $\mu$ g/mL  
508 heparin + 0.2% Tween-20 + 0.5% CHAPS + 5mM EDTA). E7.5 through E12.5, mouse  
embryos were liberated from the uterus and dissected from extraembryonic tissues and  
510 membranes. Embryos were washed with D-PBS and fixed overnight in 4%  
paraformaldehyde and then washed 3x in PBT (PBS + 0.1% Tween-20) on ice.  
512 Embryos were dehydrated in MeOH series (25%, 50%, 75%, 2x 100%, 5 min each).



Then, samples were rehydrated by reversing this series including 2 extra PBT washes.

514 Embryos were bleached in 6% H<sub>2</sub>O<sub>2</sub> in PBT for 15 minutes at RT with rocking. Embryos  
were washed 3 x 5 min in PBT and treated with 10ug/mL proteinase K for 5 min (E7.5),  
516 10 min (E8.5), 20 min (E9.5), or 30 min (E10.5+) rocking at RT and then quenched 2x  
with 2mg/mL glycine in PBT followed by 3 x 5min washes in PBTw. Embryos were re-  
518 fixed in 4% paraformaldehyde + 0.2% glutaraldehyde for 20 min with rocking and  
washed an additional 5x 5min with PBT. Embryos were then rinsed 2x in 65°C HYB  
520 buffer and incubated in HYB buffer for 3 hours at 65°C. Then, lincRNA-specific probes  
(in HYB) were added, respectively, to final concentration of 1µg/mL and hybridized  
522 overnight at 65°C. Embryos were rinsed 3 x 5 min in 65°C WASH1 buffer (50%  
formamide + 5X SSC pH 4.5 + 1% SDS) and then incubated 2 x 30 min again in 65°C  
524 WASH1 buffer. Next, embryos were washed 2 x 30 min in 65°C WASH2 (50%  
formamide + 2X SSC pH 4.5 + 0.1% Tween-20), followed by 3 x 5 min RT washes in  
526 TTBS (25mM Tris HCl pH 7.4 + 135mM NaCl + 2.5mM KCl + 0.1% Tween-20).  
Embryos were then blocked in TTBS containing 20% sheep serum for 3 hours at RT  
528 and stained overnight with alkaline phosphatase (AP) conjugated anti-DIG Fab  
fragments in TTBS + 1% sheep serum (1:5000, Roche). Embryos were then rinsed 3x  
530 5min in RT TTBS, followed by 6x 1hr TTBS washes at RT. A final TTBS wash was then  
performed overnight at 4°C. Embryos were then washed 2 x 30 min in AP buffer  
532 (100mM Tris pH 9.5 + 50mM MgCl<sub>2</sub> + 100mM NaCl + 0.1% Tween-20) at RT. Then,  
Boehringer Purple AP substrate was added to embryos to initiate staining reactions.  
534 Reactions were allowed to progress in the dark until suitable contrast was observed. AP

reactions were quenched with 3x PBT washes containing 1mM EDTA, followed by  
536 multiple PBT pH5.5 washes. A final fixation was then performed overnight in 4%  
paraformaldehyde and 0.1% glutaraldehyde at 4°C. Finally, embryos were dehydrated  
538 again in methanol series and stored in 100% MeOH at -20°C. Embryos were imaged on  
an upright microscope, and images were white balanced with Adobe Photoshop.

540

#### *Cas9 lincRNA knockout, mouse husbandry, and genotyping*

542 All mouse experiments were carried out in accordance with IACUC protocols and  
cared for by the UCSF LARC. For each lincRNA, two cut sites were targeted to induce a  
544 2-3kb deletion flanking the TSS/promoter. Two sequence-specific truncated single guide  
RNA (tru-gRNA, Supplemental table S3) (Fu, Sander et al. 2014) regions were  
546 separately cloned into pX330 (Addgene). After generating T7 promoter-containing  
sgRNA templates by PCR using Phusion TAC polymerase (NEB), tru-sgRNAs were  
548 transcribed using the Hiscribe T7 High Yield RNA Synthesis Kit (NEB). Tru-sgRNA was  
extracted using Trizol reagent (Invitrogen) and dual chloroform purifications before  
550 immunoprecipitating with isopropanol. Each tru-gRNA pair was then resuspended in  
sterile 5mM Tris-HCl before pronuclear injection by the Gladstone transgenic mouse  
552 core. Injections were carried out as previously described (Yang, Wang et al. 2014). To  
increase efficiency of obtaining deletions for each target site, all pairs were co-injected  
554 into each of 70 FVB/n pronuclei. All genotyping was performed on tail clips stored at -  
20°C. To extract gDNA, tail clips were suspended in 100µL 50mM NaOH in H<sub>2</sub>O and  
556 incubated at 95°C for 40 minutes. Tubes were agitated to break up tissue, and

remaining solids were allowed to settle before use. pH was normalized by addition of  
558 7.0 $\mu$ L of 1M Tris HCl pH 7.4. 1.5 $\mu$ L was then input into PCR reactions using Q5 2X  
master mix (NEB) and 3 gene-specific primers for simultaneous WT and KO product  
560 amplification (Supplemental table S4). Reactions were carried out according to  
manufacturer-specified recommendations. F0 founders for single lincRNA deletions  
562 were first identified and bred into C57BL/6j to establish germline transmission (F1).  
Separate F1 heterozygotes for each individual lincRNA deletion were then outbred into  
564 the C57BL/6j background for multiple generations to reduce off-target effects. *Handlr*  
and *Atcayos* null alleles were generated in collaboration with Jackson Laboratory using  
566 the same targeting strategy but in a homogenous C57BL/6j background.

#### 568 *Transverse aortic constriction cardiac hypertrophy models*

Surgery was performed under IACUC protocols and monitored by the UCSF  
570 LARC. Experiments were performed as described (Duan, McMahon et al. 2017). For  
transverse aortic constriction (TAC), 12-20 week-old male mice were anaesthetized with  
572 ketamine/xylazine and mechanically ventilated. After thoracotomy, TAC was executed  
between the left common carotid and the brachiocephalic arteries using a 7-0 silk suture  
574 and 27-gauge needle. After surgery, pressure overload was confirmed by Doppler probe  
measurement of flow velocity at the carotid artery. Echocardiography was performed at  
576 baseline, 1 week, 4 weeks, 6 weeks, and 8 weeks after operation to measure left  
ventricle (LV) fractional area change (%FAC). LV areas were obtained from two-  
578 dimensional measurements at the end-diastole and end-systole. At baseline, non-

biological echocardiography variability required outlier removal. Week 0 (pre-TAC) mice  
580 measured to be in cardiac failure (%FAC < 30.0%) with increased %FAC week 1 after  
TAC were deemed failed measurements. 1-2 instances of this were observed in all  
582 groups. From remaining data, '1.5X interquartile range rule' was used to eliminate  
outliers. The LV mass was estimated by M-mode measurements and the equation  
584 
$$M_{LV} = ((IVS_D + LVID_D + LVPW_D)^3 - LVID_D^3) \times 1.053$$
 (Marwick, Gillebert et al. 2015)  
 $M_{LV}$ , left ventricular mass;  $IVS_D$ , diastolic interventricular septum width;  $LVID_D$ , diastolic  
586 left ventricular internal diameter;  $LVPW_D$ , diastolic left ventricular posterior wall  
thickness.

588 At 8 weeks post-surgery, mice were sacrificed for analysis. First, left ventricle,  
lung, and body weights were measured. Subsequently, a 10-20mg concentric short axis  
590 slice of the left ventricle was collected and preserved in RNAlater reagent  
(ThermoFisher). Heart sections were disrupted in PureZOL (Bio-Rad) on a TissueLyser  
592 II (Qiagen). RNA was then purified with Aurum purification kit (BioRad). qRT-PCR was  
performed using TaqMan chemistry including FastStart Universal Probe Master  
594 (Roche), labeled probes from the Universal Probe Library (Roche), and gene-specific  
oligonucleotide primers run on a 7900HT (ThermoFisher) cycler with absolute  
596 quantification. Gene expression levels were normalized to *cycloB* and *Actb* internal  
controls using the  $\Delta C_t$  method.

598

### *E8.25 RNA isolation and qPCR analysis*

600 At E8.25, embryos were removed from the uterus and dissected from

extraembryonic tissues and membranes. Only embryos displaying late cardiac crescent  
602 formation before heart tube expansion and cavitation were kept and deemed to be at  
E8.25. The anterior half of each embryo was washed twice in cold PBS and transferred  
604 into Trizol (Invitrogen), while the posterior half was washed in PBS and stored at -20°C  
for genotyping. RNA from Trizol samples was precipitated using standard protocols and  
606 further purified/ condensed using Qiagen RNeasy MinElute columns. 250ng RNA was  
reverse transcribed using the AffinityScript Reverse Transcription kit (Agilent) using  
608 200ng random hexamer and/or 100ng dT<sub>20</sub> primers, where appropriate. RT-qPCR was  
subsequently performed with 5.0ng cDNA and 500nM gene-specific primers  
610 (Supplemental table S1) in PowerUP SYBR Green master mix (Thermo Fisher).  
Reactions were run on a 7900HT (ThermoFisher) cycler with absolute quantification.  
612 Gene expression levels were normalized to *Actb* internal controls using the  $\Delta$ Ct method.

#### 614 *E15.5 Histology*

At E15.5, embryos were liberated from the uterus and dissected from  
616 extraembryonic tissues and membranes. Whole hearts were removed, rinsed twice in  
D-PBS, and fixed overnight in 4% paraformaldehyde. Each heart was then paraffin  
618 embedded and sectioned at an oblique transverse plane for four chamber visualization.  
Hematoxylin and eosin staining and imaging were performed by the Gladstone  
620 Histology Core (UCSF).

#### 622 **Description of Figures**

**Figure 1.** Epigenetically regulated cardiac lincRNAs. A. Differentiation progression of  
624 mESCs into cardiomyocytes used for lincRNA candidate selection; ESC, embryonic  
stem cell, MES, mesoderm, CP, cardiac progenitor, CM, cardiomyocyte. B. Criteria for  
626 lincRNA identification and resulting 9 candidates; \*, name assigned by Bruneau lab.

628 **Figure 2.** Genomic characterization of *Rubie* and *Handlr* *in vitro*. A. UCSC Genome  
Browser tracks of *Rubie* RNA-seq and overlaid histone H3 ChIP-seq at ESC, MES, CP,  
630 and CM stages of *in vitro* differentiation; RefSeq annotation in blue. B. Quantified  
expression of *Rubie* and *Bmp4* at each differentiation stage. C. 3D Genome Browser Hi-  
632 C heatmap of chromosome interactions around *Bmp4* and *Rubie* loci. D. UCSC  
Genome Browser tracks of *Handlr* RNA-seq and overlaid histone H3 ChIP-seq at ESC,  
634 MES, CP, and CM stages of *in vitro* differentiation. Ensembl annotation in red; actual  
exon structure of predominant *Handlr* transcript in black with blue stars. E. Quantified  
636 expression of *Handlr* and *Hand2* at each differentiation stage. F. 3D Genome Browser  
Hi-C heatmap of chromosome interactions around *Handlr* and *Hand2* loci; TAD,  
638 topologically associated domain. ESC, embryonic stem cell, MES, mesoderm, CP,  
cardiac progenitor, CM, cardiomyocyte; blue, ESC, green, MES, orange, CP, red, CM;  
640 K4me3, histone H3 lysine 4 trimethylation; K27me3, histone H3 lysine 27 trimethylation;  
K27Ac, histone H3 lysine 27 acetylation; TAD, topologically associated domain.

642

**Figure 3.** lincRNA expression patterns *in vivo*. A. *in situ* hybridization staining for *Rubie*  
644 from E7.5 through E9.5. B. *in situ* hybridization staining for *Handlr* at E8.5 and E9.5. C.

*in situ* hybridization staining for *Atcayos* at E9.5 and E10.5. D. *in situ* hybridization  
646 staining for *HrtLincR4* at E8.25, E8.5, and E9.5. E. *in situ* hybridization staining for  
*HrtLincR5* at E8.0 and E9.5. F. *in situ* hybridization staining for *HrtLincRX* from E7.5  
648 through E10.5. A, anterior; P, posterior; Em, embryonic region; Ex, extraembryonic  
region; CC, cardiac crescent; Ht, heart tube; H, heart; OV, otic vesicle.

650

**Figure 4.** Cas9 ablation of cardiac lincRNAs *in vivo* and effects on local gene  
652 expression. A. lincRNA TSS/promoter ablation strategy; TSS, transcriptional start site;  
tru-sgRNA, truncated single guide RNA. B. Schematic for RT-qPCR on anterior half of  
654 E8.25 embryo; A, anterior, P, posterior, red line, bisection point. C. Left:  
Electrophoresed gDNA PCR genotyping products of *Rubie* alleles and resulting *Rubie*  
656 and *Bmp4* expression in anterior E8.25 embryos; Right: correlation between *Rubie*  
expression and *Bmp4* expression for all genotypes or *Rubie*<sup>+/-</sup> only, respectively. D.  
658 Electrophoresed gDNA PCR genotyping products of *Handlr* alleles and resulting *Handlr*  
and *Hand2* expression in anterior E8.25 embryos. E. Electrophoresed gDNA PCR  
660 genotyping products of *Atcayos* alleles and resulting *Atcayos* and *Nmrk2* expression in  
anterior E8.25 embryo. F. Electrophoresed gDNA PCR genotyping products of  
662 *HrtLincR5* alleles and resulting *HrtLincR5* and *Mn1* expression in anterior E8.25  
embryos. G. Electrophoresed gDNA PCR genotyping products of *HrtLincR4* alleles and  
664 resulting *HrtLincR4* and *Trabd2b* expression in anterior E8.25 embryos. H. Left:  
Electrophoresed gDNA PCR genotyping products of *HrtLincRX* alleles and resulting  
666 *HrtLincRX* and *Plac1* expression in anterior E8.25 embryos; Right: IntaRNA 2.0 binding

prediction between *HrtLincRX* 3' miRNAs and Plac1. \*, p < 0.05; \*\*\*, p < 0.005; n.s., not  
668 significant; Student's 2-tailed t-test. Data presented as mean +/- SEM.

670 **Figure 5.** Viability and phenotypic effects after lincRNA knockout. A. Offspring  
recovered at weaning from *Rubie*<sup>+/-</sup> x *Rubie*<sup>+/-</sup> cross vs expected Mendelian ratios. B.  
672 Representative sporadic circling behavior in *Rubie*<sup>-/-</sup> offspring; #, only observed in  
*Rubie*<sup>-/-</sup> genotype over 2+ years of observation. C. Offspring recovered at weaning from  
674 *Handlr*<sup>+/-</sup> x *Handlr*<sup>+/-</sup> cross vs expected Mendelian ratios. D. Offspring recovered at  
weaning from *Atcayos*<sup>+/-</sup> x *Atcayos*<sup>+/-</sup> cross vs expected Mendelian ratios. E. LV mass  
676 calculated by echocardiographic measurements in *Handlr* WT versus NULL and  
*Atcayos* WT versus NULL litter-matched adult males, respectively. F. LV contractility  
678 measured by echocardiography in *Handlr* WT versus NULL and *Atcayos* WT versus  
NULL litter-matched adult males, respectively. G. Time course of cardiac contractility  
680 after TAC in *Handlr* WT versus NULL litter-matched adult males. H. Time course of  
cardiac contractility after TAC in *Atcayos* WT versus NULL litter-matched adult males. I.  
682 Week 8 post-TAC LV and lung weights in *Handlr* WT versus NULL litter-matched adult  
males. J. Week 8 post-TAC LV and lung weights in *Atcayos* WT versus NULL litter-  
684 matched adult males. \*, p < 0.05; \*\*, p < 0.01; \*\*\*, p < 0.005, Student's 2-tailed t-test,  
except panel I, Z-test; LV, left ventricle; FAC, fractional area shortening; TAC,  
686 transverse aortic constriction; WT, wild type.



688 **Figure 6.** Effect of *Rubie* ablation on heart development at E15.5. A-C,E. Oblique  
transverse hematoxylin and eosin histological sections of cardiac ventricular and OFT  
690 morphogenesis, respectively, at E15.5. A. Representative wild type WT morphology. B.  
Representative *Rubie*<sup>-/-</sup> morphology. C. Representative *Bmp4*<sup>+/-</sup> (*Actb-Cre*<sup>+</sup>)  
692 morphology. D. Left: Electrophoresed gDNA PCR genotyping products of *Rubie* and  
*Actb-Cre* transgene alleles, respectively. Right: Offspring recovered at weaning from  
694 *Rubie*<sup>+/-</sup>; *Actb-Cre*<sup>+</sup> x *Bmp4*<sup>f/f</sup> mating vs expected Mendelian ratios G. H. Representative  
*Bmp4*<sup>+/-</sup>; *Rubie*<sup>+/-</sup> (*Actb-Cre*<sup>+</sup>) morphology in 2 separate individuals. RV, right ventricle;  
696 LV, left ventricle; OFT, outflow tract; WT, wild type; scale bar, 300μm; arrow, distorted  
OFT orientation.

698

**Supplemental Figure S1.** Predominant *Handlr* transcript *in vivo*. A. Electrophoresed  
700 *Handlr* 3' RACE PCR products from E9.5 mouse cDNA. B. Sanger sequence of  
predominant RNA transcript, polyA tail highlighted; T in place of U due to DNA  
702 sequencing; arrow, location of 3'RACE *Handlr*-specific primer.

704 **Supplemental Figure S2.** Genomic characterization of *Atcayos* and *HrtLincR4* *in vitro*.  
A. UCSC Genome Browser tracks of *Atcayos* and *Nmrk2* RNA-seq and overlaid histone  
706 H3 ChIP-seq at ESC, MES, CP, and CM stages of *in vitro* differentiation. B. Quantified  
expression of *Atcayos* and *Nmrk2* at each differentiation stage. C. UCSC Genome  
708 Browser tracks of *HrtLincR4* RNA-seq and overlaid histone H3 ChIP-seq during cardiac  
differentiation *in vitro*; D. Quantified expression of *HrtlincR4* and *Trabd2b* at each

710 differentiation stage. E. 3D Genome Browser Hi-C heatmap of chromosome interactions  
around *HrtlincR4* and *Trabd2b* loci. ESC, embryonic stem cell, MES, mesoderm, CP,  
712 cardiac progenitor, CM, cardiomyocyte; blue, ESC, green, MES, orange, CP, red, CM;  
K4me3, histone H3 lysine 4 trimethylation; K27me3, histone H3 lysine 27 trimethylation;  
714 K27Ac, histone H3 lysine 27 acetylation; TAD, topologically associated domain.  
Ensembl annotations in red.

716

**Supplemental Figure S3.** Genomic characterization of *HrtLincR5* and *HrtLincRX* in

718 *vitro*. A. UCSC Genome Browser tracks of *HrtLincR5* RNA-seq and overlaid histone H3  
ChIP-seq during cardiac differentiation *in vitro*. Ensembl annotation in red. B. Quantified  
720 expression of *HrtlincR5* and *Mn1* at each differentiation stage. C. 3D Genome Browser  
Hi-C heatmap (of chromosome interactions around *HrtlincR5* and *Mn1* loci. D. Genome  
722 Browser tracks of *HrtLincRX* RNA-seq and overlaid histone H3 ChIP-seq during cardiac  
differentiation *in vitro*; E. Quantified expression of *HrtLincRX* and *Plac1* at each  
724 differentiation stage. F. 3D Genome Browser Hi-C heatmap of chromosome interactions  
around *HrtlincRX* and *Plac1* loci. ESC, embryonic stem cell, MES, mesoderm, cMES,  
726 cardiac mesoderm; CP, cardiac progenitor, CM, cardiomyocyte; blue, ESC; green,  
MES; orange, CP; red, CM; K4me3, histone H3 lysine 4 trimethylation; K27me3, histone  
728 H3 lysine 27 trimethylation; K27Ac, histone H3 lysine 27 acetylation; RefSeq annotation  
in blue. RefSeq annotations, including 3' miRNA cluster, in blue.

730

**Supplemental Figure S4.** Genomic characterization of *5033406O09Rik*,

732 *9630002D21Rik*, and *2810410L24Rik* *in vitro*. A. UCSC Genome Browser tracks of  
5033406O09Rik RNA-seq and overlaid histone H3 ChIP-seq during cardiac  
734 differentiation *in vitro*, as well as quantified expression at each differentiation stage. B.  
UCSC Genome Browser tracks of *9630002D21Rik* RNA-seq and overlaid histone H3  
736 ChIP-seq during cardiac differentiation *in vitro*, as well as quantified expression at each  
differentiation stage. C. UCSC Genome Browser tracks of *2810410L24Rik* RNA-seq  
738 and overlaid histone H3 ChIP-seq during cardiac differentiation *in vitro*, as well as  
quantified expression at each differentiation stage. ESC, embryonic stem cell, MES,  
740 mesoderm, cMES, cardiac mesoderm; CP, cardiac progenitor, CM, cardiomyocyte;  
blue, ESC; green, MES; orange, CP; red, CM; K4me3, histone H3 lysine 4  
742 trimethylation; K27me3, histone H3 lysine 27 trimethylation; K27Ac, histone H3 lysine  
27 acetylation; Ensembl annotation in red, RefSeq annotations in blue.

744

**Supplemental Figure S5.** Molecular characterization of lincRNA cohort. A. UCSC  
746 Genome Browser tracks of PhyloCSF codon scores for all three frames of known  
protein coding gene *Bmp4*, micropeptide coding genes *Apela* and *Dwarf*, and lincRNA  
748 cohort; red box, potential 28 amino acid-coding open reading frame in *HrtLincR4*; scale,  
-15 to +15; positive score indicates higher coding potential; green, (+) strand; red, (-)  
750 strand. B. Coding-non-Coding-Index (CNCI) scores for lincRNA cohort compared to  
known lincRNA *Neat1*. C. Comparison of CPAT algorithm calculations of Fickett and  
752 Hexamer scores for known protein coding genes, micropeptide coding genes, and our  
lincRNA cohort. D. Nuclear vs cytoplasmic enrichment of lincRNA cohort compared to

754 *Actb* and known nuclear-enriched lincRNA *Neat1*; \*,  $p < 0.05$ ; \*\*\*,  $p < 0.005$ ; n.s., not  
significant; Student's 2-tailed t-test. E. Efficiency of RT-qPCR amplification from dT<sub>20</sub>- or  
756 random hexamer-primed cDNA for lincRNA cohort compared to *Actb* and known  
polyadenylated lincRNA *Neat1*. Data presented as mean +/- SEM.

758

**Supplemental Figure S6.** lincRNA expression patterns *in vivo*. A. *in situ* hybridization  
760 staining for *5033406O09Rik* at E7.25 and E7.5. B. *in situ* hybridization staining for  
*9630002D21Rik* at E8.5. C. *in situ* hybridization staining for *2810410L24Rik* at E8.25  
762 and E9.5. A, anterior; Em, embryonic region; Ex, extraembryonic region; P, posterior;  
CC, cardiac crescent; Ht, heart tube; H, heart.

764

**Supplemental Figure S7.** Viability and phenotypic effects after lincRNA knockout. A.  
766 Offspring recovered at weaning from *HrtLincR4*<sup>+/-</sup> x *HrtLincR4*<sup>+/-</sup> cross vs expected  
Mendelian ratios. B. Offspring recovered at weaning from *HrtLincR5*<sup>+/-</sup> x *HrtLincR5*<sup>+/-</sup>  
768 cross vs expected Mendelian ratios. C. Male offspring recovered at weaning from  
*HrtLincRX*<sup>+/-</sup> x *HrtLincRX*<sup>+/-</sup> cross vs expected Mendelian ratios. D. RNA-seq expression  
770 of *Handlr* in adult heart before and after TAC. E. RNA-seq expression of *Atcayos* in  
adult heart before and after TAC from Duan et al, 2017. \*\*,  $p < 0.01$ , Student's 2-tailed t-  
772 test; TAC, transverse aortic constriction; WT, wild type.

774 **Supplemental Figure S8.** Effect of *Handlr* ablation on heart development at E15.5. A-  
D. Oblique transverse hematoxylin and eosin histological sections of cardiac ventricular

776 and OFT morphogenesis, respectively, at E15.5. A. Representative WT morphology.  
Representative *Handlr*<sup>-/-</sup> morphology. C. Representative *Hand2*<sup>+/-</sup> morphology. D.  
778 Representative *Hand2*<sup>+/-</sup>; *Handlr*<sup>+/-</sup> morphology. RV, right ventricle; LV, left ventricle;  
OFT, outflow tract; WT, wild type; scale bar, 300μm.

780

## References

- 782 (2012). "An integrated encyclopedia of DNA elements in the human genome." Nature  
784 **489**(7414): 57-74.
- Alexanian, M., D. Maric, S. P. Jenkinson, M. Mina, C. E. Friedman, C.-C. Ting, R.  
786 Micheletti, I. Plaisance, M. Nemir, D. Maison, J. Kernén, I. Pezzuto, D. Villeneuve, F.  
Burdet, M. Ibberson, S. L. Leib, N. J. Palpant, N. Hernandez, S. Ounzain and T.  
788 Pedrazzini (2017). "A transcribed enhancer dictates mesendoderm specification in  
pluripotency." Nature Communications **8**(1): 1806.
- 790 Amandio, A. R., A. Necsulea, E. Joye, B. Mascrez and D. Duboule (2016). "Hotair Is  
Dispensable for Mouse Development." PLoS Genet **12**(12): e1006232.
- 792 Anderson, K. M., D. M. Anderson, J. R. McAnally, J. M. Shelton, R. Bassel-Duby and E.  
N. Olson (2016). "Transcription of the non-coding RNA upperhand controls Hand2  
794 expression and heart development." Nature **539**(7629): 433-436.
- Carninci, P., T. Kasukawa, S. Katayama, J. Gough, M. C. Frith, N. Maeda, R. Oyama,  
796 T. Ravasi, B. Lenhard, C. Wells, R. Kodzius, K. Shimokawa, V. B. Bajic, S. E. Brenner,  
S. Batalov, A. R. Forrest, M. Zavolan, M. J. Davis, L. G. Wilming, V. Aidinis, J. E. Allen,  
798 A. Ambesi-Impiombato, R. Apweiler, R. N. Aturaliya, T. L. Bailey, M. Bansal, L. Baxter,  
K. W. Beisel, T. Bersano, H. Bono, A. M. Chalk, K. P. Chiu, V. Choudhary, A.
- 800 Christoffels, D. R. Clutterbuck, M. L. Crowe, E. Dalla, B. P. Dalrymple, B. de Bono, G.  
Della Gatta, D. di Bernardo, T. Down, P. Engstrom, M. Fagiolini, G. Faulkner, C. F.
- 802 Fletcher, T. Fukushima, M. Furuno, S. Futaki, M. Gariboldi, P. Georgii-Hemming, T. R.  
Gingeras, T. Gojobori, R. E. Green, S. Gustincich, M. Harbers, Y. Hayashi, T. K.

804 Hensch, N. Hirokawa, D. Hill, L. Huminiecki, M. Iacono, K. Ikeo, A. Iwama, T. Ishikawa,  
M. Jakt, A. Kanapin, M. Katoh, Y. Kawasawa, J. Kelso, H. Kitamura, H. Kitano, G.  
806 Kollias, S. P. Krishnan, A. Kruger, S. K. Kummerfeld, I. V. Kurochkin, L. F. Lareau, D.  
Lazarevic, L. Lipovich, J. Liu, S. Liuni, S. McWilliam, M. Madan Babu, M. Madera, L.  
808 Marchionni, H. Matsuda, S. Matsuzawa, H. Miki, F. Mignone, S. Miyake, K. Morris, S.  
Mottagui-Tabar, N. Mulder, N. Nakano, H. Nakauchi, P. Ng, R. Nilsson, S. Nishiguchi,  
810 S. Nishikawa, F. Nori, O. Ohara, Y. Okazaki, V. Orlando, K. C. Pang, W. J. Pavan, G.  
Pavesi, G. Pesole, N. Petrovsky, S. Piazza, J. Reed, J. F. Reid, B. Z. Ring, M.  
812 Ringwald, B. Rost, Y. Ruan, S. L. Salzberg, A. Sandelin, C. Schneider, C. Schonbach,  
K. Sekiguchi, C. A. Semple, S. Seno, L. Sessa, Y. Sheng, Y. Shibata, H. Shimada, K.  
814 Shimada, D. Silva, B. Sinclair, S. Sperling, E. Stupka, K. Sugiura, R. Sultana, Y.  
Takenaka, K. Taki, K. Tammoja, S. L. Tan, S. Tang, M. S. Taylor, J. Tegner, S. A.  
816 Teichmann, H. R. Ueda, E. van Nimwegen, R. Verardo, C. L. Wei, K. Yagi, H.  
Yamanishi, E. Zabarovsky, S. Zhu, A. Zimmer, W. Hide, C. Bult, S. M. Grimmond, R. D.  
818 Teasdale, E. T. Liu, V. Brusica, J. Quackenbush, C. Wahlestedt, J. S. Mattick, D. A.  
Hume, C. Kai, D. Sasaki, Y. Tomaru, S. Fukuda, M. Kanamori-Katayama, M. Suzuki, J.  
820 Aoki, T. Arakawa, J. Iida, K. Imamura, M. Itoh, T. Kato, H. Kawaji, N. Kawagashira, T.  
Kawashima, M. Kojima, S. Kondo, H. Konno, K. Nakano, N. Ninomiya, T. Nishio, M.  
822 Okada, C. Plessy, K. Shibata, T. Shiraki, S. Suzuki, M. Tagami, K. Waki, A. Watahiki, Y.  
Okamura-Oho, H. Suzuki, J. Kawai and Y. Hayashizaki (2005). "The transcriptional  
824 landscape of the mammalian genome." *Science* **309**(5740): 1559-1563.

- Charite, J., D. G. McFadden and E. N. Olson (2000). "The bHLH transcription factor  
826 dHAND controls Sonic hedgehog expression and establishment of the zone of  
polarizing activity during limb development." Development **127**(11): 2461-2470.
- 828 Danesh, S. M., A. Villasenor, D. Chong, C. Soukup and O. Cleaver (2009). "BMP and  
BMP receptor expression during murine organogenesis." Gene Expr Patterns **9**(5): 255-  
830 265.
- Daneshvar, K., J. V. Pondick, B. M. Kim, C. Zhou, S. R. York, J. A. Macklin, A.  
832 Abualteen, B. Tan, A. A. Sigova, C. Marcho, K. D. Tremblay, J. Mager, M. Y. Choi and  
A. C. Mullen (2016). "DIGIT Is a Conserved Long Noncoding RNA that Regulates GSC  
834 Expression to Control Definitive Endoderm Differentiation of Embryonic Stem Cells."  
Cell Rep **17**(2): 353-365.
- 836 Derrien, T., R. Johnson, G. Bussotti, A. Tanzer, S. Djebali, H. Tilgner, G. Guernec, D.  
Martin, A. Merkel, D. G. Knowles, J. Lagarde, L. Veeravalli, X. Ruan, Y. Ruan, T.  
838 Lassmann, P. Carninci, J. B. Brown, L. Lipovich, J. M. Gonzalez, M. Thomas, C. A.  
Davis, R. Shiekhattar, T. R. Gingeras, T. J. Hubbard, C. Notredame, J. Harrow and R.  
840 Guigo (2012). "The GENCODE v7 catalog of human long noncoding RNAs: analysis of  
their gene structure, evolution, and expression." Genome Res **22**(9): 1775-1789.
- 842 Devine, W. P., J. D. Wythe, M. George, K. Koshiba-Takeuchi and B. G. Bruneau (2014).  
"Early patterning and specification of cardiac progenitors in gastrulating mesoderm."  
844 Elife **3**.
- Diederichs, S. (2014). "The four dimensions of noncoding RNA conservation." Trends  
846 Genet **30**(4): 121-123.



- Diguet, N., S. A. J. Trammell, C. Tannous, R. Deloux, J. Piquereau, N. Mougenot, A.  
848 Gouge, M. Gressette, B. Manoury, J. Blanc, M. Breton, J. F. Decaux, G. G. Lavery, I.  
Baczko, J. Zoll, A. Garnier, Z. Li, C. Brenner and M. Mericskay (2018). "Nicotinamide  
850 Riboside Preserves Cardiac Function in a Mouse Model of Dilated Cardiomyopathy."  
Circulation **137**(21): 2256-2273.
- 852 Dixon, J. R., S. Selvaraj, F. Yue, A. Kim, Y. Li, Y. Shen, M. Hu, J. S. Liu and B. Ren  
(2012). "Topological domains in mammalian genomes identified by analysis of  
854 chromatin interactions." Nature **485**(7398): 376-380.
- Duan, Q., S. McMahon, P. Anand, H. Shah, S. Thomas, H. T. Salunga, Y. Huang, R.  
856 Zhang, A. Sahadevan, M. E. Lemieux, J. D. Brown, D. Srivastava, J. E. Bradner, T. A.  
McKinsey and S. M. Haldar (2017). "BET bromodomain inhibition suppresses innate  
858 inflammatory and profibrotic transcriptional networks in heart failure." Science  
translational medicine **9**(390): eaah5084.
- 860 Dunn, N. R., G. E. Winnier, L. K. Hargett, J. J. Schrick, A. B. Fogo and B. L. Hogan  
(1997). "Haploinsufficient phenotypes in Bmp4 heterozygous null mice and modification  
862 by mutations in Gli3 and Alx4." Dev Biol **188**(2): 235-247.
- Fant, M., A. Farina, R. Nagaraja and D. Schlessinger (2010). "PLAC1 (Placenta-specific  
864 1): a novel, X-linked gene with roles in reproductive and cancer biology." Prenat Diagn  
**30**(6): 497-502.
- 866 Fickett, J. W. (1982). "Recognition of protein coding regions in DNA sequences."  
Nucleic Acids Res **10**(17): 5303-5318.

- 868 Fu, Y., J. D. Sander, D. Reyon, V. M. Cascio and J. K. Joung (2014). "Improving  
CRISPR-Cas nuclease specificity using truncated guide RNAs." Nat Biotechnol **32**(3):  
870 279-284.
- Goff, L. A., A. F. Groff, M. Sauvageau, Z. Trayer-Gibson, D. B. Sanchez-Gomez, M.  
872 Morse, R. D. Martin, L. E. Elcavage, S. C. Liapis, M. Gonzalez-Celeiro, O. Plana, E. Li,  
C. Gerhardinger, G. S. Tomassy, P. Arlotta and J. L. Rinn (2015). "Spatiotemporal  
874 expression and transcriptional perturbations by long noncoding RNAs in the mouse  
brain." Proc Natl Acad Sci U S A **112**(22): 6855-6862.
- 876 Goldman, D. C., N. Donley and J. L. Christian (2009). "Genetic interaction between  
Bmp2 and Bmp4 reveals shared functions during multiple aspects of mouse  
878 organogenesis." Mech Dev **126**(3-4): 117-127.
- Gore-Panter, S. R., J. Hsu, J. Barnard, C. S. Moravec, D. R. Van Wagoner, M. K.  
880 Chung and J. D. Smith (2016). "PANCR, the PITX2 Adjacent Noncoding RNA, Is  
Expressed in Human Left Atria and Regulates PITX2c Expression." Circ Arrhythm  
882 Electrophysiol **9**(1): e003197.
- Goudarzi, M., K. Berg, L. M. Pieper and A. F. Schier (2019). "Individual long non-coding  
884 RNAs have no overt functions in zebrafish embryogenesis, viability and fertility." Elife **8**.
- Grote, P., L. Wittler, D. Hendrix, F. Koch, S. Wahrisch, A. Beisaw, K. Macura, G. Blass,  
886 M. Kellis, M. Werber and B. G. Herrmann (2013). "The tissue-specific lncRNA Fendrr is  
an essential regulator of heart and body wall development in the mouse." Dev Cell  
888 **24**(2): 206-214.

- Guo, X., Y. Xu, Z. Wang, Y. Wu, J. Chen, G. Wang, C. Lu, W. Jia, J. Xi, S. Zhu, Z.  
890 Jiapaer, X. Wan, Z. Liu, S. Gao and J. Kang (2018). "A Linc1405/Eomes Complex  
Promotes Cardiac Mesoderm Specification and Cardiogenesis." Cell Stem Cell **22**(6):  
892 893-908.e896.
- Han, P., W. Li, C. H. Lin, J. Yang, C. Shang, S. T. Nuernberg, K. K. Jin, W. Xu, C. Y.  
894 Lin, C. J. Lin, Y. Xiong, H. Chien, B. Zhou, E. Ashley, D. Bernstein, P. S. Chen, H. V.  
Chen, T. Quertermous and C. P. Chang (2014). "A long noncoding RNA protects the  
896 heart from pathological hypertrophy." Nature **514**(7520): 102-106.
- Hon, C. C., J. A. Ramilowski, J. Harshbarger, N. Bertin, O. J. Rackham, J. Gough, E.  
898 Denisenko, S. Schmeier, T. M. Poulsen, J. Severin, M. Lizio, H. Kawaji, T. Kasukawa,  
M. Itoh, A. M. Burroughs, S. Noma, S. Djebali, T. Alam, Y. A. Medvedeva, A. C. Testa,  
900 L. Lipovich, C. W. Yip, I. Abugessaisa, M. Mendez, A. Hasegawa, D. Tang, T.  
Lassmann, P. Heutink, M. Babina, C. A. Wells, S. Kojima, Y. Nakamura, H. Suzuki, C.  
902 O. Daub, M. J. de Hoon, E. Arner, Y. Hayashizaki, P. Carninci and A. R. Forrest (2017).  
"An atlas of human long non-coding RNAs with accurate 5' ends." Nature **543**(7644):  
904 199-204.
- Hou, J., H. Long, C. Zhou, S. Zheng, H. Wu, T. Guo, Q. Wu, T. Zhong and T. Wang  
906 (2017). "Long noncoding RNA Braveheart promotes cardiogenic differentiation of  
mesenchymal stem cells in vitro." Stem Cell Res Ther **8**(1): 4.
- Hutchinson, J. N., A. W. Ensminger, C. M. Clemson, C. R. Lynch, J. B. Lawrence and A.  
Chess (2007). "A screen for nuclear transcripts identifies two linked noncoding RNAs  
910 associated with SC35 splicing domains." BMC Genomics **8**: 39.

- Jackman, S. M., X. Kong and M. E. Fant (2012). "Plac1 (placenta-specific 1) is essential  
912 for normal placental and embryonic development." Mol Reprod Dev **79**(8): 564-572.
- Jiao, K., H. Kulesa, K. Tompkins, Y. Zhou, L. Batts, H. S. Baldwin and B. L. M. Hogan  
914 (2003). "An essential role of Bmp4 in the atrioventricular septation of the mouse heart."  
Genes & Development **17**(19): 2362-2367.
- 916 Katayama, S., Y. Tomaru, T. Kasukawa, K. Waki, M. Nakanishi, M. Nakamura, H.  
Nishida, C. C. Yap, M. Suzuki, J. Kawai, H. Suzuki, P. Carninci, Y. Hayashizaki, C.  
918 Wells, M. Frith, T. Ravasi, K. C. Pang, J. Hallinan, J. Mattick, D. A. Hume, L. Lipovich,  
S. Batalov, P. G. Engstrom, Y. Mizuno, M. A. Faghihi, A. Sandelin, A. M. Chalk, S.  
920 Mottagui-Tabar, Z. Liang, B. Lenhard and C. Wahlestedt (2005). "Antisense  
transcription in the mammalian transcriptome." Science **309**(5740): 1564-1566.
- 922 Kent, W. J. (2002). "BLAT--the BLAST-like alignment tool." Genome Res **12**(4): 656-  
664.
- 924 Kino, T., D. E. Hurt, T. Ichijo, N. Nader and G. P. Chrousos (2010). "Noncoding RNA  
gas5 is a growth arrest- and starvation-associated repressor of the glucocorticoid  
926 receptor." Sci Signal **3**(107): ra8.
- Klattenhoff, C. A., J. C. Scheuermann, L. E. Surface, R. K. Bradley, P. A. Fields, M. L.  
928 Steinhauser, H. Ding, V. L. Butty, L. Torrey, S. Haas, R. Abo, M. Tabebordbar, R. T.  
Lee, C. B. Burge and L. A. Boyer (2013). "Braveheart, a long noncoding RNA required  
930 for cardiovascular lineage commitment." Cell **152**(3): 570-583.
- Kurian, L., A. Aguirre, I. Sancho-Martinez, C. Benner, T. Hishida, T. B. Nguyen, P.  
932 Reddy, E. Nivet, M. N. Krause, D. A. Nelles, C. R. Esteban, J. M. Campistol, G. W. Yeo

- and J. C. I. Belmonte (2015). "Identification of novel long noncoding RNAs underlying  
934 vertebrate cardiovascular development." *Circulation* **131**(14): 1278-1290.
- Lai, K. M., G. Gong, A. Atanasio, J. Rojas, J. Quispe, J. Posca, D. White, M. Huang, D.  
936 Fedorova, C. Grant, L. Miloscio, G. Droguett, W. T. Poueymirou, W. Auerbach, G. D.  
Yancopoulos, D. Friendewey, J. Rinn and D. M. Valenzuela (2015). "Diverse  
938 Phenotypes and Specific Transcription Patterns in Twenty Mouse Lines with Ablated  
LincRNAs." *PLoS One* **10**(4): e0125522.
- 940 Lin, M. F., I. Jungreis and M. Kellis (2011). "PhyloCSF: a comparative genomics method  
to distinguish protein coding and non-coding regions." *Bioinformatics* **27**(13): i275-i282.
- 942 Mann, M., P. R. Wright and R. Backofen (2017). "IntaRNA 2.0: enhanced and  
customizable prediction of RNA-RNA interactions." *Nucleic Acids Res* **45**(W1): W435-  
944 w439.
- Martin, D., C. Pantoja, A. Fernandez Minan, C. Valdes-Quezada, E. Molto, F. Matesanz,  
946 O. Bogdanovic, E. de la Calle-Mustienes, O. Dominguez, L. Taher, M. Furlan-Magaril,  
A. Alcina, S. Canon, M. Fedetz, M. A. Blasco, P. S. Pereira, I. Ovcharenko, F. Recillas-  
948 Targa, L. Montoliu, M. Manzanares, R. Guigo, M. Serrano, F. Casares and J. L. Gomez-  
Skarmeta (2011). "Genome-wide CTCF distribution in vertebrates defines equivalent  
950 sites that aid the identification of disease-associated genes." *Nat Struct Mol Biol* **18**(6):  
708-714.
- 952 Marwick, T. H., T. C. Gillebert, G. Aurigemma, J. Chirinos, G. Derumeaux, M. Galderisi,  
J. Gottdiener, B. Haluska, E. Ofili, P. Segers, R. Senior, R. J. Tapp and J. L. Zamorano  
954 (2015). "Recommendations on the use of echocardiography in adult hypertension: a

report from the European Association of Cardiovascular Imaging (EACVI) and the  
956 American Society of Echocardiography (ASE)dagger." Eur Heart J Cardiovasc Imaging  
**16(6)**: 577-605.

958 Mattioli, K., P. J. Volders, C. Gerhardinger, J. C. Lee, P. G. Maass, M. Mele and J. L.  
Rinn (2019). "High-throughput functional analysis of lncRNA core promoters elucidates  
960 rules governing tissue specificity." Genome Res **29(3)**: 344-355.

Nakagawa, S., J. Y. Ip, G. Shioi, V. Tripathi, X. Zong, T. Hirose and K. V. Prasanth  
962 (2012). "Malat1 is not an essential component of nuclear speckles in mice." Rna **18(8)**:  
1487-1499.

964 Nakagawa, S., T. Naganuma, G. Shioi and T. Hirose (2011). "Paraspeckles are  
subpopulation-specific nuclear bodies that are not essential in mice." J Cell Biol **193(1)**:  
966 31-39.

Nelson, B. R., C. A. Makarewich, D. M. Anderson, B. R. Winders, C. D. Troupes, F. Wu,  
968 A. L. Reese, J. R. McAnally, X. Chen, E. T. Kavalali, S. C. Cannon, S. R. Houser, R.  
Bassel-Duby and E. N. Olson (2016). "A peptide encoded by a transcript annotated as  
970 long noncoding RNA enhances SERCA activity in muscle." Science **351(6270)**: 271-  
275.

972 Nora, E. P., B. R. Lajoie, E. G. Schulz, L. Giorgetti, I. Okamoto, N. Servant, T. Piolot, N.  
L. van Berkum, J. Meisig, J. Sedat, J. Gribnau, E. Barillot, N. Bluthgen, J. Dekker and E.  
974 Heard (2012). "Spatial partitioning of the regulatory landscape of the X-inactivation  
centre." Nature **485(7398)**: 381-385.

976 Ounzain, S., R. Micheletti, C. Arnan, I. Plaisance, D. Cecchi, B. Schroen, F. Reverter,  
M. Alexanian, C. Gonzales, S. Y. Ng, G. Bussotti, I. Pezzuto, C. Notredame, S.  
978 Heymans, R. Guigo, R. Johnson and T. Pedrazzini (2015). "CARMEN, a human super  
enhancer-associated long noncoding RNA controlling cardiac specification,  
980 differentiation and homeostasis." J Mol Cell Cardiol **89**(Pt A): 98-112.  
Pauli, A., M. L. Norris, E. Valen, G.-L. Chew, J. A. Gagnon, S. Zimmerman, A. Mitchell,  
982 J. Ma, J. Dubrulle, D. Reyon, S. Q. Tsai, J. K. Joung, A. Saghatelian and A. F. Schier  
(2014). "Toddler: An Embryonic Signal That Promotes Cell Movement via Apelin  
984 Receptors." Science (New York, N.Y.) **343**(6172): 1248636-1248636.  
Perea-Gomez, A., W. Shawlot, H. Sasaki, R. R. Behringer and S. Ang (1999).  
986 "HNF3beta and Lim1 interact in the visceral endoderm to regulate primitive streak  
formation and anterior-posterior polarity in the mouse embryo." Development **126**(20):  
988 4499-4511.  
Perry, R. B. and I. Ulitsky (2016). "The functions of long noncoding RNAs in  
990 development and stem cells." Development **143**(21): 3882-3894.  
Quinn, J. J. and H. Y. Chang (2016). "Unique features of long non-coding RNA  
992 biogenesis and function." Nat Rev Genet **17**(1): 47-62.  
R-Core-Team (2017) "R: A language and environment for statistical computing. R  
994 Foundation for Statistical Computing."  
Ramos, A. D., R. E. Andersen, S. J. Liu, T. J. Nowakowski, S. J. Hong, C. Gertz, R. D.  
996 Salinas, H. Zarabi, A. R. Kriegstein and D. A. Lim (2015). "The long noncoding RNA

- Pnky regulates neuronal differentiation of embryonic and postnatal neural stem cells." *Cell Stem Cell* **16**(4): 439-447.
- 998
- Ritter, N., T. Ali, N. Kopitchinski, P. Schuster, A. Beisaw, D. A. Hendrix, M. H. Schulz, M. Muller-McNicoll, S. Dimmeler and P. Grote (2019). "The lncRNA Locus Handsdown Regulates Cardiac Gene Programs and Is Essential for Early Mouse Development." *Dev Cell*.
- 1000
- 1002
- Roberts, K. A., V. E. Abaira, A. F. Tucker, L. V. Goodrich and N. C. Andrews (2012). "Mutation of Rubie, a novel long non-coding RNA located upstream of Bmp4, causes vestibular malformation in mice." *PLoS One* **7**(1): e29495.
- 1004
- Sasaki, Y. T., T. Ideue, M. Sano, T. Mituyama and T. Hirose (2009). "MENepsilon/beta noncoding RNAs are essential for structural integrity of nuclear paraspeckles." *Proc Natl Acad Sci U S A* **106**(8): 2525-2530.
- 1006
- 1008
- Sati, S., S. Ghosh, V. Jain, V. Scaria and S. Sengupta (2012). "Genome-wide analysis reveals distinct patterns of epigenetic features in long non-coding RNA loci." *Nucleic Acids Res* **40**(20): 10018-10031.
- 1010
- 1012
- Sauvageau, M., L. A. Goff, S. Lodato, B. Bonev, A. F. Groff, C. Gerhardinger, D. B. Sanchez-Gomez, E. Hacisuleyman, E. Li, M. Spence, S. C. Liapis, W. Mallard, M. Morse, M. R. Swerdel, M. F. D'Ecclesissis, J. C. Moore, V. Lai, G. Gong, G. D. Yancopoulos, D. Friendewey, M. Kellis, R. P. Hart, D. M. Valenzuela, P. Arlotta and J. L. Rinn (2013). "Multiple knockout mouse models reveal lincRNAs are required for life and brain development." *Elife* **2**: e01749.
- 1014
- 1016



- 1018 Shen, X., B. Soibam, A. Benham, X. Xu, M. Chopra, X. Peng, W. Yu, W. Bao, R. Liang,  
A. Azares, P. Liu, P. H. Gunaratne, M. Mercola, A. J. Cooney, R. J. Schwartz and Y. Liu  
1020 (2016). "miR-322/-503 cluster is expressed in the earliest cardiac progenitor cells and  
drives cardiomyocyte specification." Proceedings of the National Academy of Sciences  
1022 **113**(34): 9551-9556.
- Srivastava, D., T. Thomas, Q. Lin, M. L. Kirby, D. Brown and E. N. Olson (1997).  
1024 "Regulation of cardiac mesodermal and neural crest development by the bHLH  
transcription factor, dHAND." Nat Genet **16**(2): 154-160.
- 1026 Sun, L., H. Luo, D. Bu, G. Zhao, K. Yu, C. Zhang, Y. Liu, R. Chen and Y. Zhao (2013).  
"Utilizing sequence intrinsic composition to classify protein-coding and long non-coding  
1028 transcripts." Nucleic Acids Research **41**(17): e166-e166.
- Trapnell, C., B. A. Williams, G. Pertea, A. Mortazavi, G. Kwan, M. J. van Baren, S. L.  
1030 Salzberg, B. J. Wold and L. Pachter (2010). "Transcript assembly and quantification by  
RNA-Seq reveals unannotated transcripts and isoform switching during cell  
1032 differentiation." Nat Biotechnol **28**(5): 511-515.
- van Wely, K. H., A. C. Molijn, A. Buijs, M. A. Meester-Smoor, A. J. Aarnoudse, A.  
1034 Hellemons, P. den Besten, G. C. Grosveld and E. C. Zwarthoff (2003). "The MN1  
oncoprotein synergizes with coactivators RAC3 and p300 in RAR-RXR-mediated  
1036 transcription." Oncogene **22**(5): 699-709.
- Wamstad, J. A., J. M. Alexander, R. M. Truty, A. Shrikumar, F. Li, K. E. Eilertson, H.  
1038 Ding, J. N. Wylie, A. R. Pico, J. A. Capra, G. Erwin, S. J. Kattman, G. M. Keller, D.  
Srivastava, S. S. Levine, K. S. Pollard, A. K. Holloway, L. A. Boyer and B. G. Bruneau

- 1040 (2012). "Dynamic and coordinated epigenetic regulation of developmental transitions in the cardiac lineage." Cell **151**(1): 206-220.
- 1042 Wang, L., H. J. Park, S. Dasari, S. Wang, J. P. Kocher and W. Li (2013). "CPAT: Coding-Potential Assessment Tool using an alignment-free logistic regression model." Nucleic Acids Res **41**(6): e74.
- 1044 Wickham, H. (2016). "ggplot2: Elegant Graphics for Data Analysis." Springer-Verlag New York.
- 1046 Wong, G. K., D. A. Passey and J. Yu (2001). "Most of the human genome is transcribed." Genome Res **11**(12): 1975-1977.
- 1048 Wozney, J. M., V. Rosen, A. J. Celeste, L. M. Mitsock, M. J. Whitters, R. W. Kriz, R. M. Hewick and E. A. Wang (1988). "Novel regulators of bone formation: molecular clones and activities." Science **242**(4885): 1528-1534.
- 1052 Xie, C., J. Yuan, H. Li, M. Li, G. Zhao, D. Bu, W. Zhu, W. Wu, R. Chen and Y. Zhao (2014). "NONCODEv4: exploring the world of long non-coding RNA genes." Nucleic Acids Research **42**(Database issue): D98-D103.
- 1054 Xu, C., Y. Zhang, Q. Wang, Z. Xu, J. Jiang, Y. Gao, M. Gao, J. Kang, M. Wu, J. Xiong, K. Ji, W. Yuan, Y. Wang and H. Liu (2016). "Long non-coding RNA GAS5 controls human embryonic stem cell self-renewal by maintaining NODAL signalling." Nat Commun **7**: 13287.
- 1058 Yang, H., H. Wang and R. Jaenisch (2014). "Generating genetically modified mice using CRISPR/Cas-mediated genome engineering." Nat Protoc **9**(8): 1956-1968.
- 1060

Zhang, B., G. Arun, Y. S. Mao, Z. Lazar, G. Hung, G. Bhattacharjee, X. Xiao, C. J.

1062 Booth, J. Wu, C. Zhang and D. L. Spector (2012). "The lncRNA Malat1 is dispensable  
for mouse development but its transcription plays a cis-regulatory role in the adult." Cell  
1064 Rep **2**(1): 111-123.

Zhang, X., J. G. Abreu, C. Yokota, B. T. MacDonald, S. Singh, K. L. Coburn, S. M.

1066 Cheong, M. M. Zhang, Q. Z. Ye, H. C. Hang, H. Steen and X. He (2012). "Tiki1 is  
required for head formation via Wnt cleavage-oxidation and inactivation." Cell **149**(7):  
1068 1565-1577.

1070

Figure 1

A

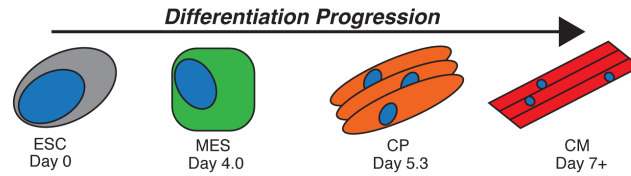

B

***lincRNA* Criteria**

1. Noncode v4 annotated
2. *lincRNA* TSS > 1kb from protein coding TSS
3. Splices > 1 (discrete from nearby genes)
4. FPKM < 0.5 in ESCs
5. FPKM > 1.0 in cardiac progenitors
6. Promoter H3K4me3 in cardiac progenitors
7. Promoter H3K27Ac in cardiac progenitors

| <b>Annotated Name</b> | <b>Short Name</b> | <b>Location (mm9)</b>     | <b>Neighbor</b> |
|-----------------------|-------------------|---------------------------|-----------------|
| Gm15219               | <i>Rubie</i>      | chr14:47188052-47189230   | <i>Bmp4</i>     |
| 5033428I22Rik         | <i>Handlr*</i>    | chr8:59810914-59819479    | <i>Hand2</i>    |
| 2310050B05Rik         | <i>Atcayos</i>    | chr10:80657435-80673622   | <i>Nmrk2</i>    |
| Gm12829               | <i>HrtLincR4*</i> | chr4:114353409-114360200  | <i>Trabd2b</i>  |
| E130006D01Rik         | <i>HrtLincR5*</i> | chr5:112163303-112190748  | <i>Mn1</i>      |
| C430049B03Rik         | <i>HrtLincRX*</i> | chrX:50406289-50410367    | <i>Plac1</i>    |
| 5033406O09Rik         | -                 | chr11:120046713-120050065 | -               |
| 9630002D21Rik         | -                 | chr12:113180201-113182695 | -               |
| 2810410L24Rik         | -                 | chr12:72678951-72687808   | -               |

Figure 2

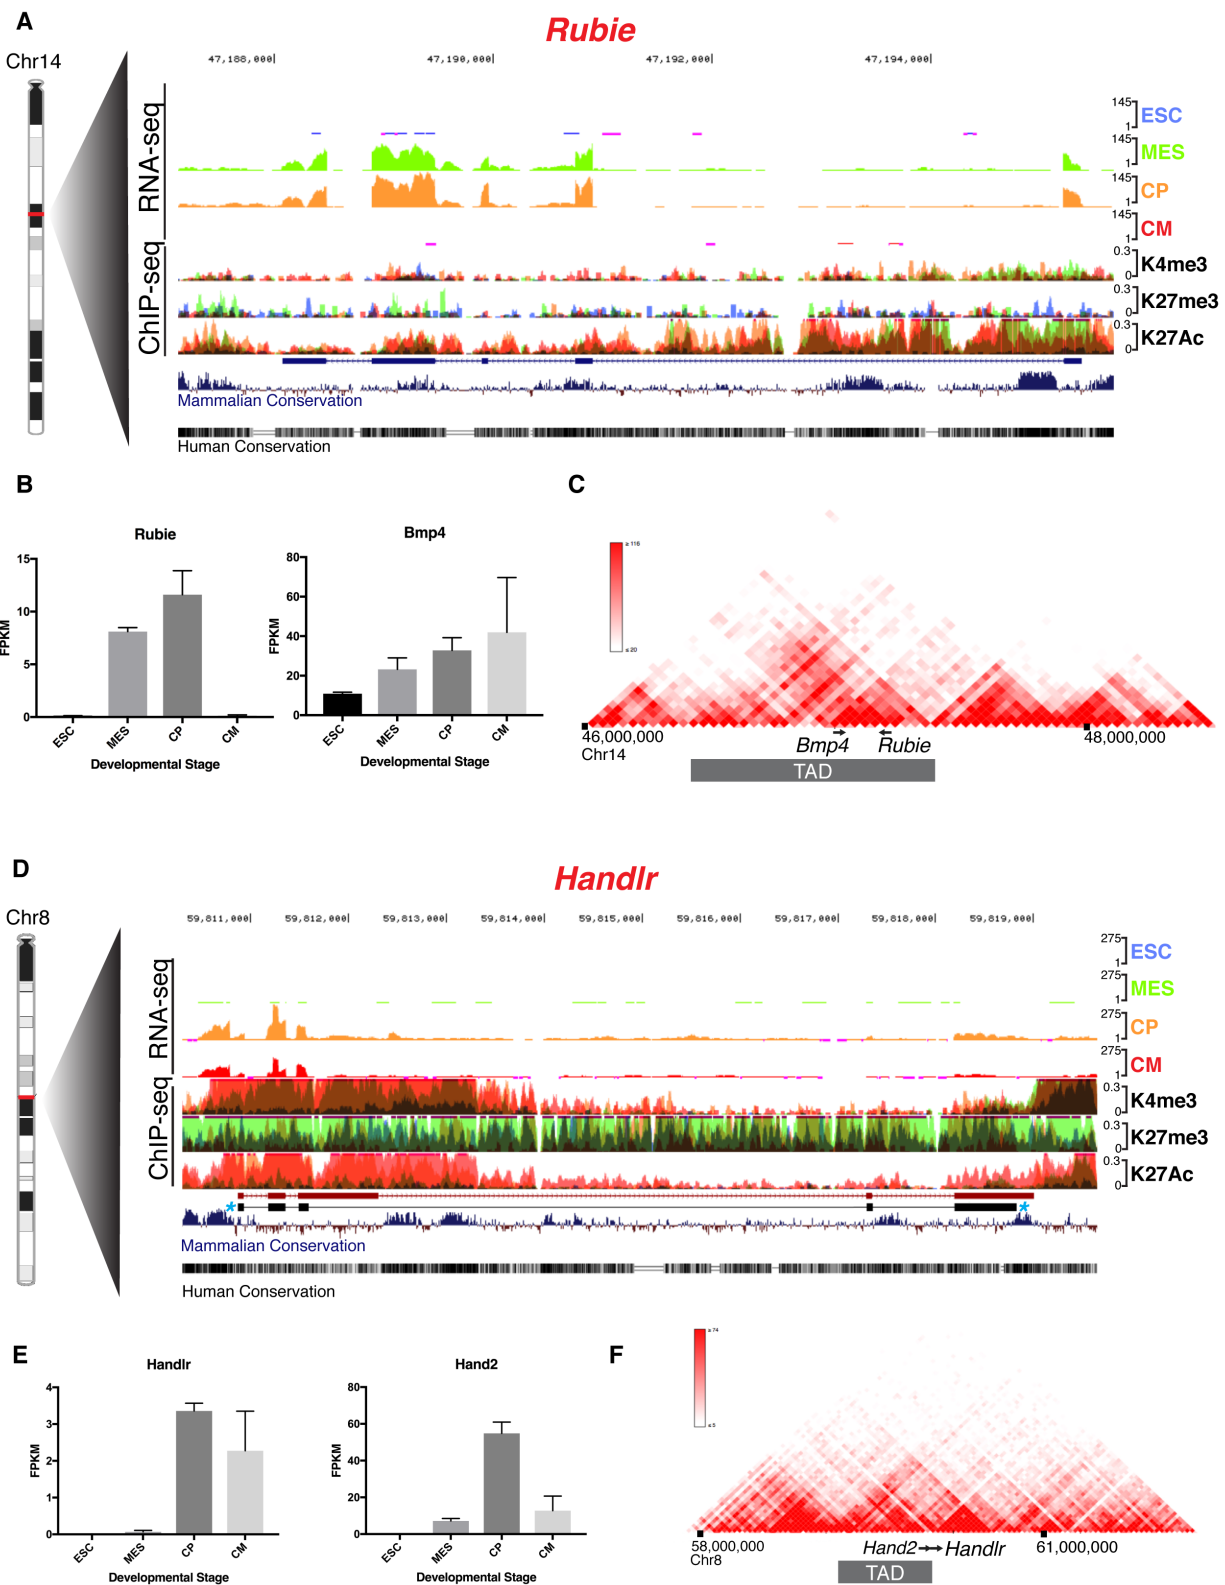

1074

Figure 3

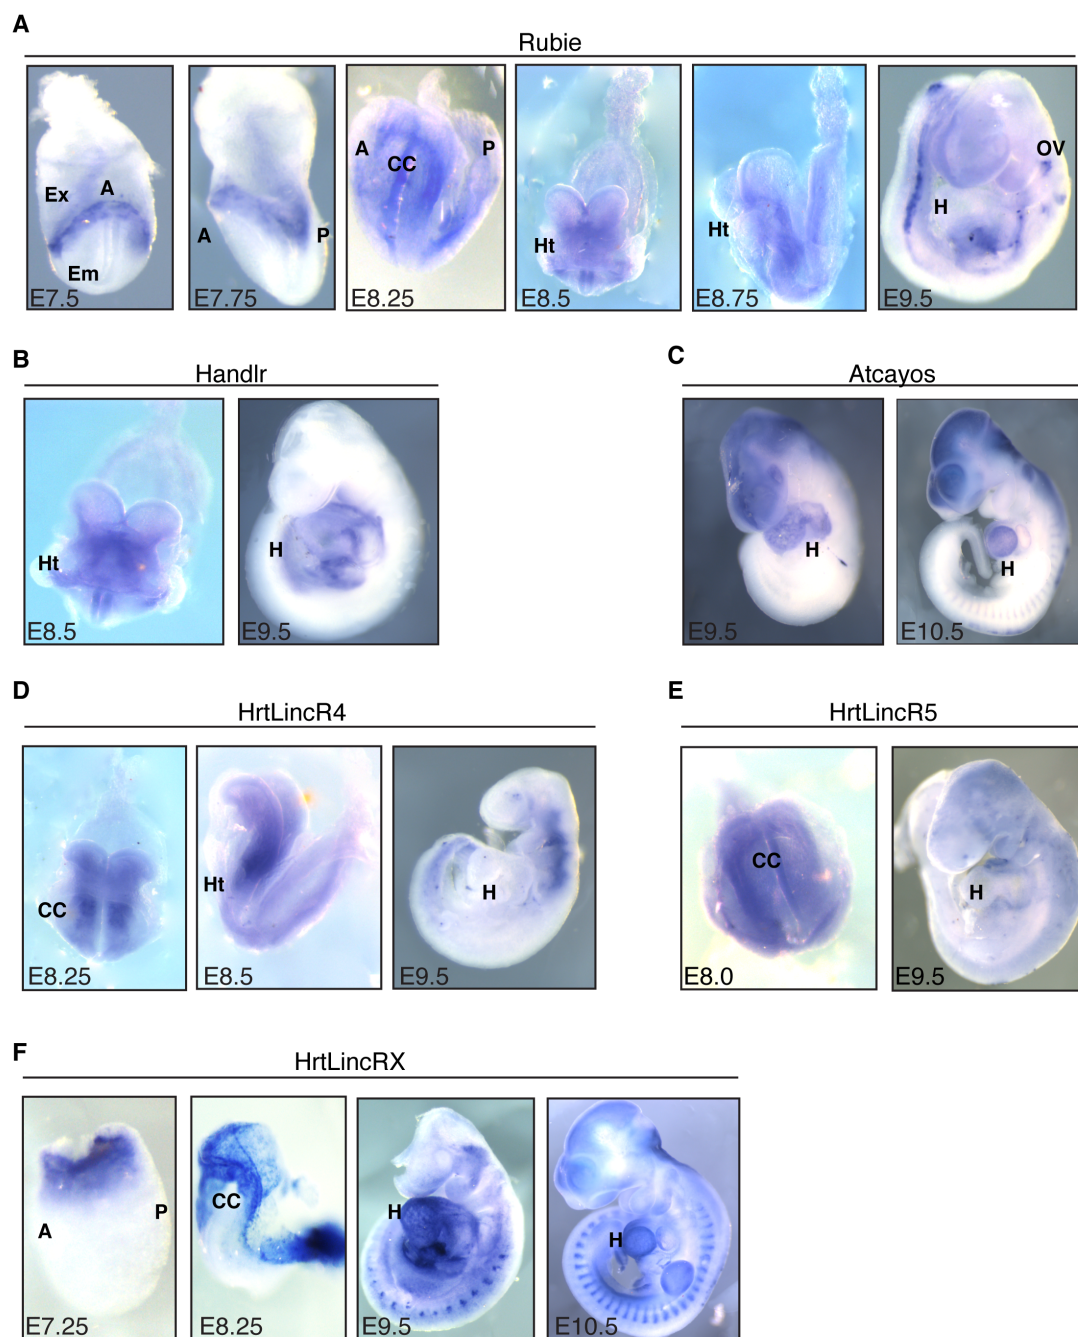

Figure 4

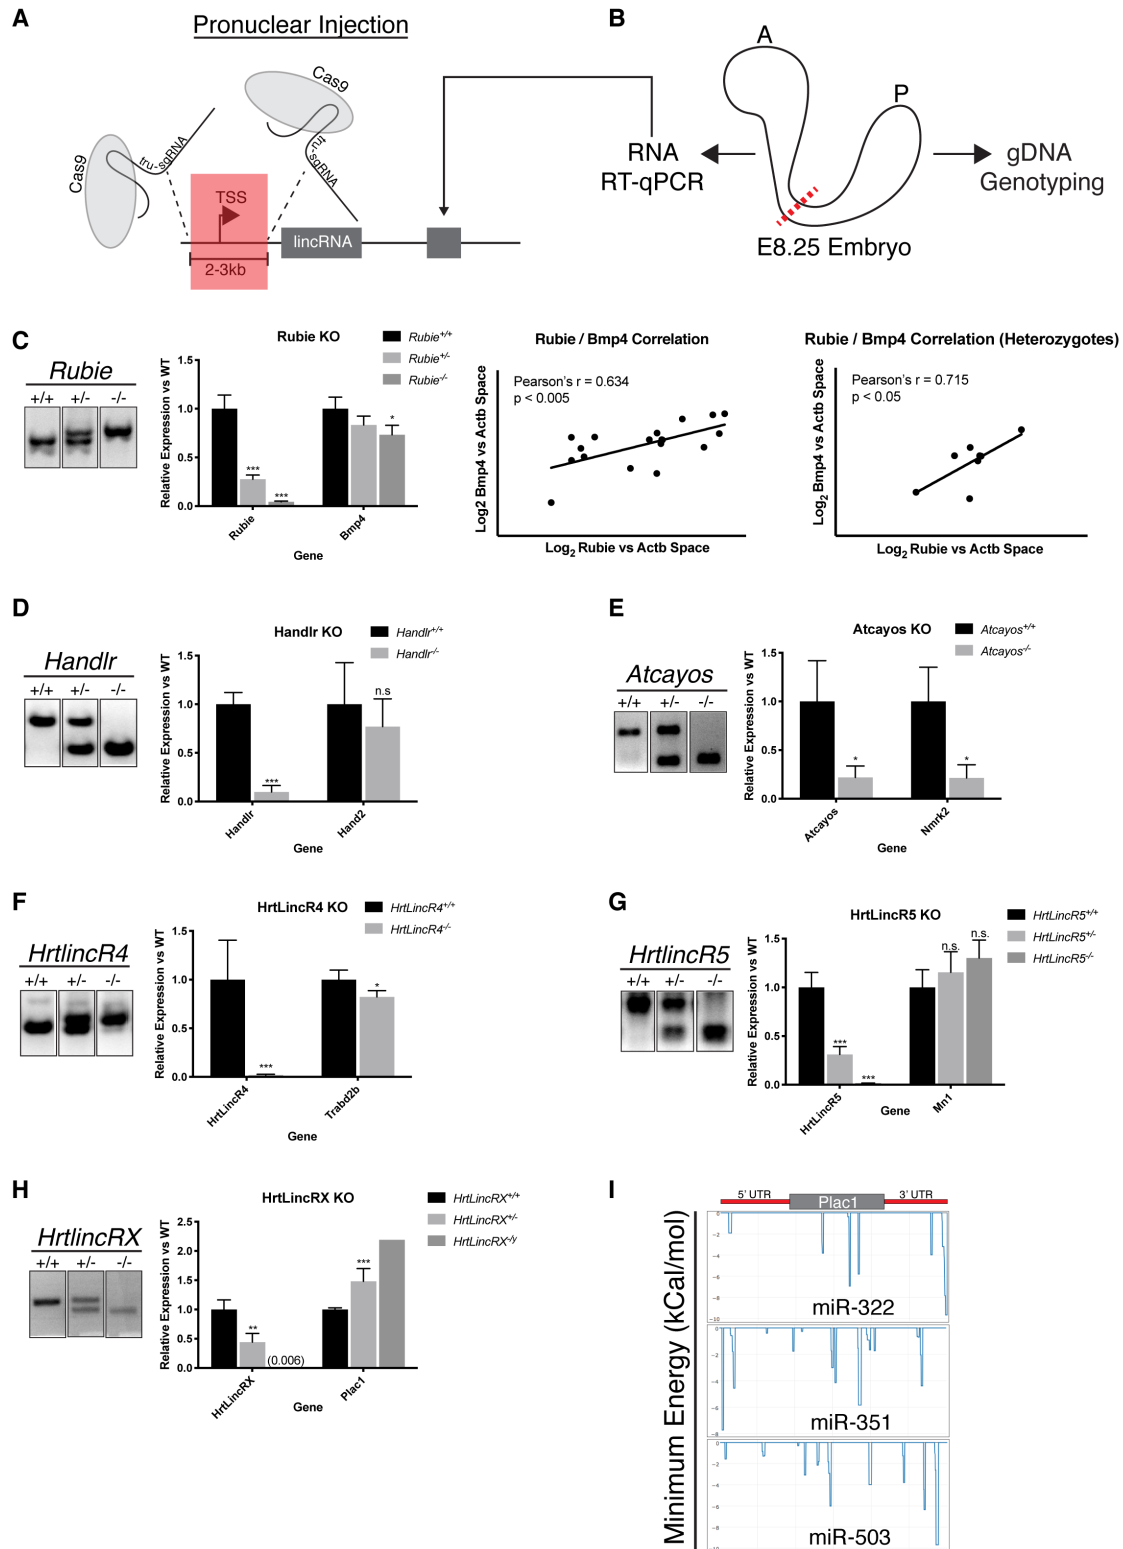

Figure 5

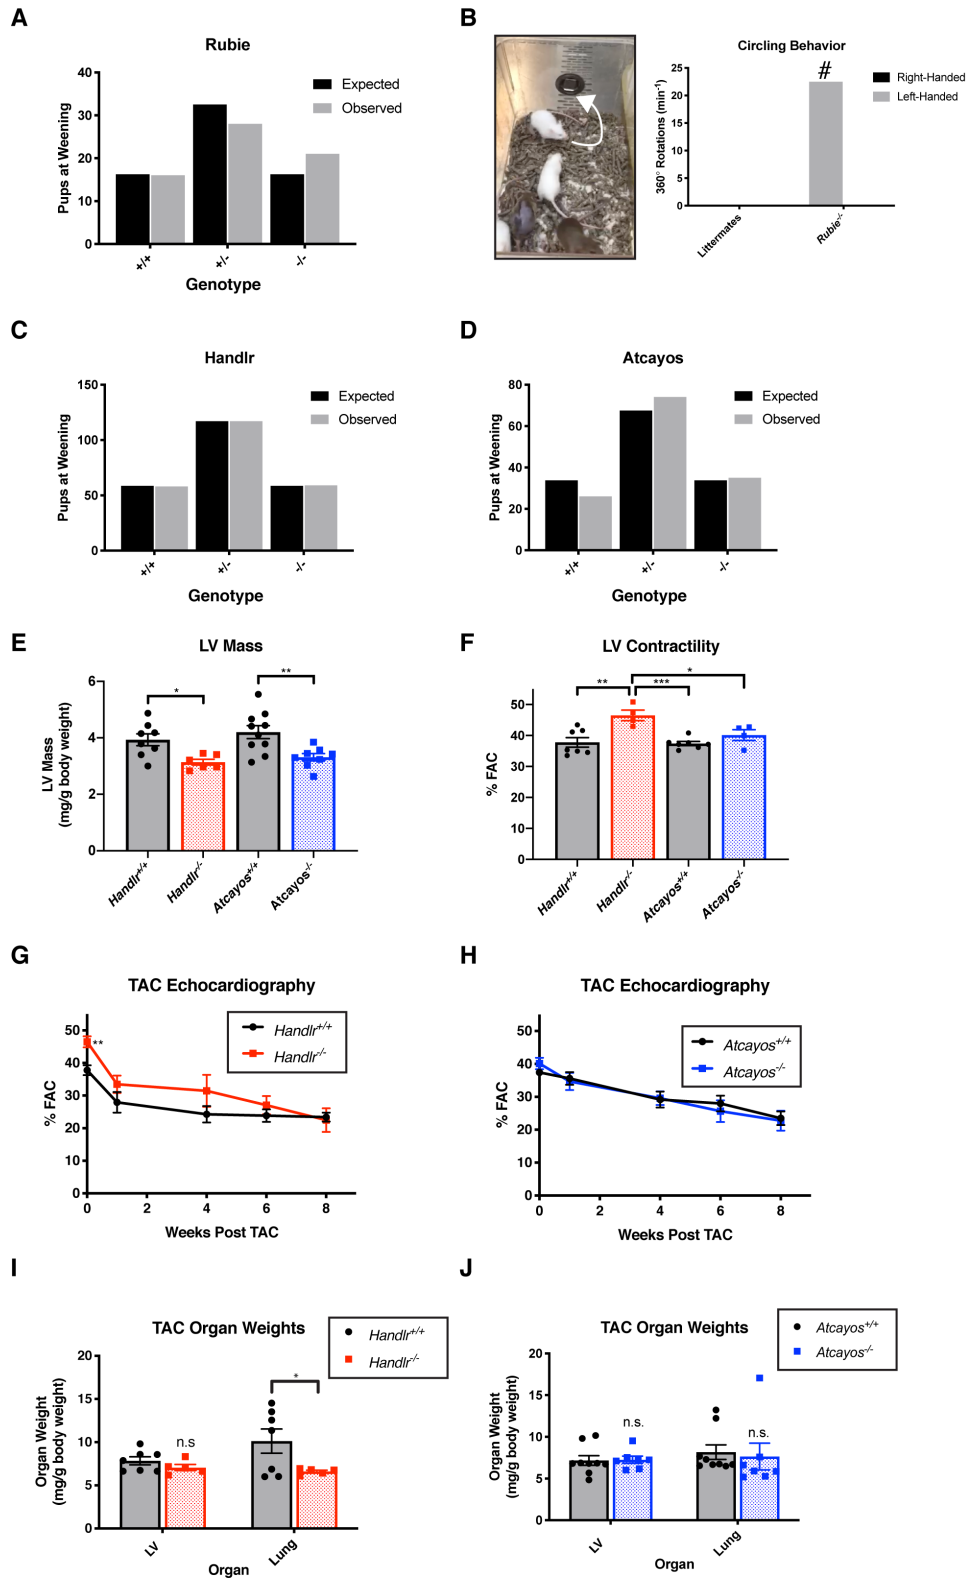



Figure 6

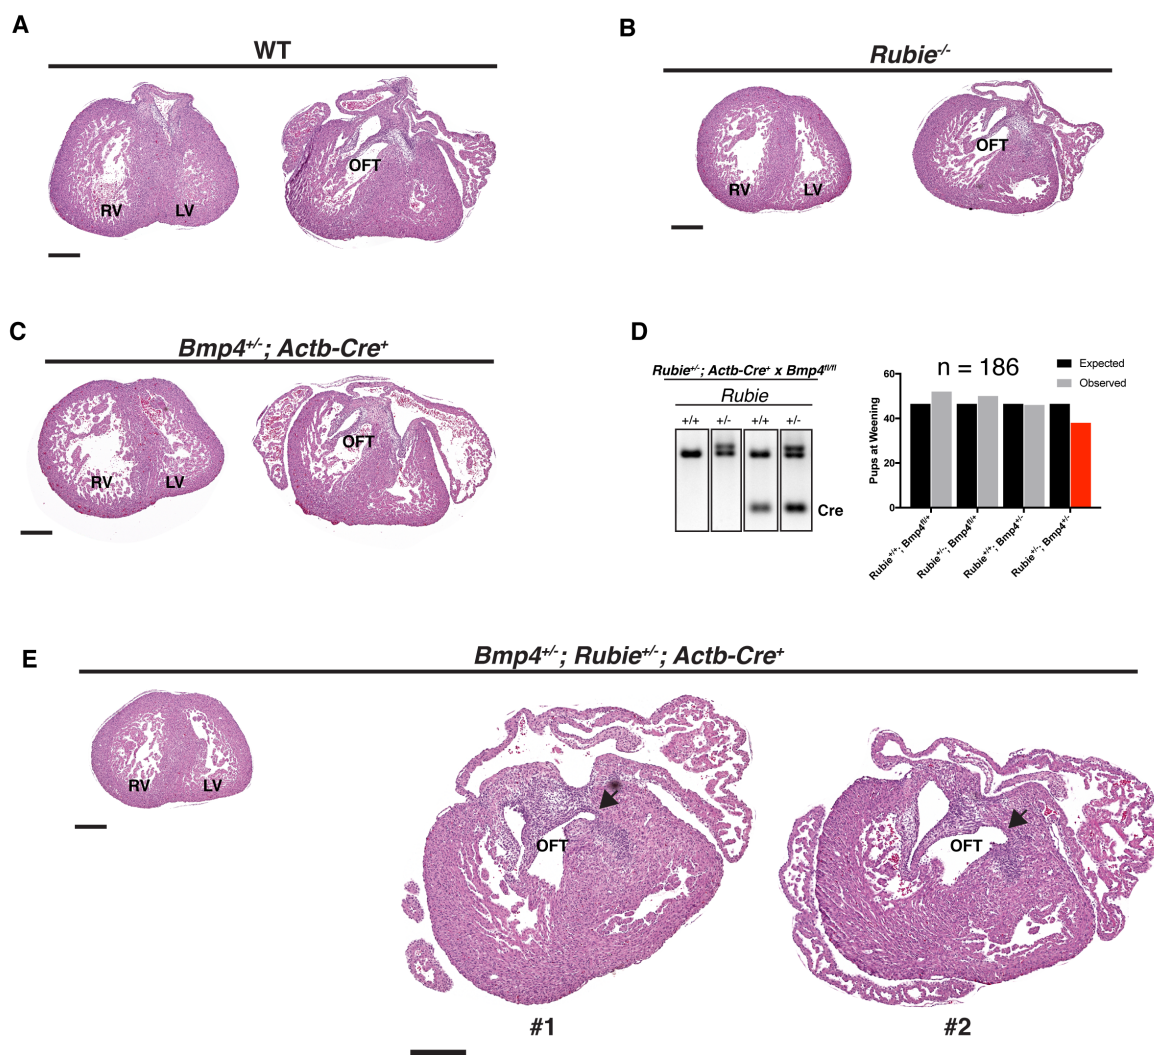

## Supplemental Figure S1

**A**

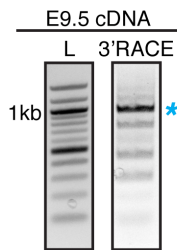

**B**

### \* Predominant Handlr Isoform \*

#### *Exon 1*

TCTTCTCTGCACTGTCTCTCCTTTGTGCATCTTGGACTCCTGAAGGCCACTCAGAGCATA  
GATGCG

#### *Exon 2*

CCAGCTTAGTTCTTTGGAGAAGCAGTGTGGAGTCCTAAAAAAGGAGGCTGAGTCTTACCGT  
TGAGGTCGGTGCCGGTAGAGAATGGGAGGGAGTCTGCAGGAGCCAAGCACCCCTAAAGAAG  
AGGAAGAGAGCACGTTGCTGAGATTTGAACAGCGACCTGAGAGGTCAGACTGGACCCAGG  
CCTCCTCAAG

#### *Exon 3*

AAGGAACGGAGATGGAGATTCTCCCTTTCCCGGCCCTTCGGTCTTCTCCGGAAGAGCT  
ACTCTGGCCAGCTCTGGGCTAGGGGCAGTGGCCGAACAGAAGGGGAAA

#### *Exon 4*

GTTTTTAGGTTTTGCCTGTTGCTCTTAGGGATCCAGGGGCAGAGTTTTGCCTTAGGTGCTG  
AAG

#### *Exon 5*

ACAGCTGCTGGAGCCTGTTGCTTTTTACACCACAGATACTTCATGCTGCCTAATATTCTACC  
GAGCCAGCCTAGGGGACTTGGATCTGTCTCGCCTGGGGCTAAGAGAATAGTTTCTCTAAGA  
AGAAAACAGTTCTAATTCAAAGATGCTGGATCTGGCTTCTTTAAAGCCTGAAGTCGCTGAA  
GTGGCCATAGAACTATGGGGTCCAGAGGACTGCCAGTCTCAGCCAGCCTTTAGGCTGGAGA  
GAGGCTGTGGGCCTGCTTGGGGACTAAAATGGATGAATAAGAAACCTGTAAGAAATGTAAC  
AGATGGAATGGCAAGGAGGAGAGCGCTGGAGATTGTTTCAAGTGTGAGCTGAGTTTTCTGA  
GTTTGTACTGGGGATGCCTTTGCACACAGTGAAGGTGCCCCCTCCCTAAGTGGCTCTTGT  
GCACAAACAGCCCCACCCTGCGCACACACTGTGGGTCTCAGTAGGGACTGAGGGTGTAGG  
TGCTCAGGTTTTGGGGTGGTGGTGAAGGGCACTCAGAATCAACAAGACAGGGCGGGGA  
AAATCAAAATCAACCAAGGAACCAGCCTTCCATTTCTGAAAAGCCGCGCTCTGNNCCCGTG  
CTTCAGTTCTGAAATACGAATAAATGGNGTCAGATCCCGTACTACAAAAAAAAAAAAAAAAA

Supplemental Figure S2

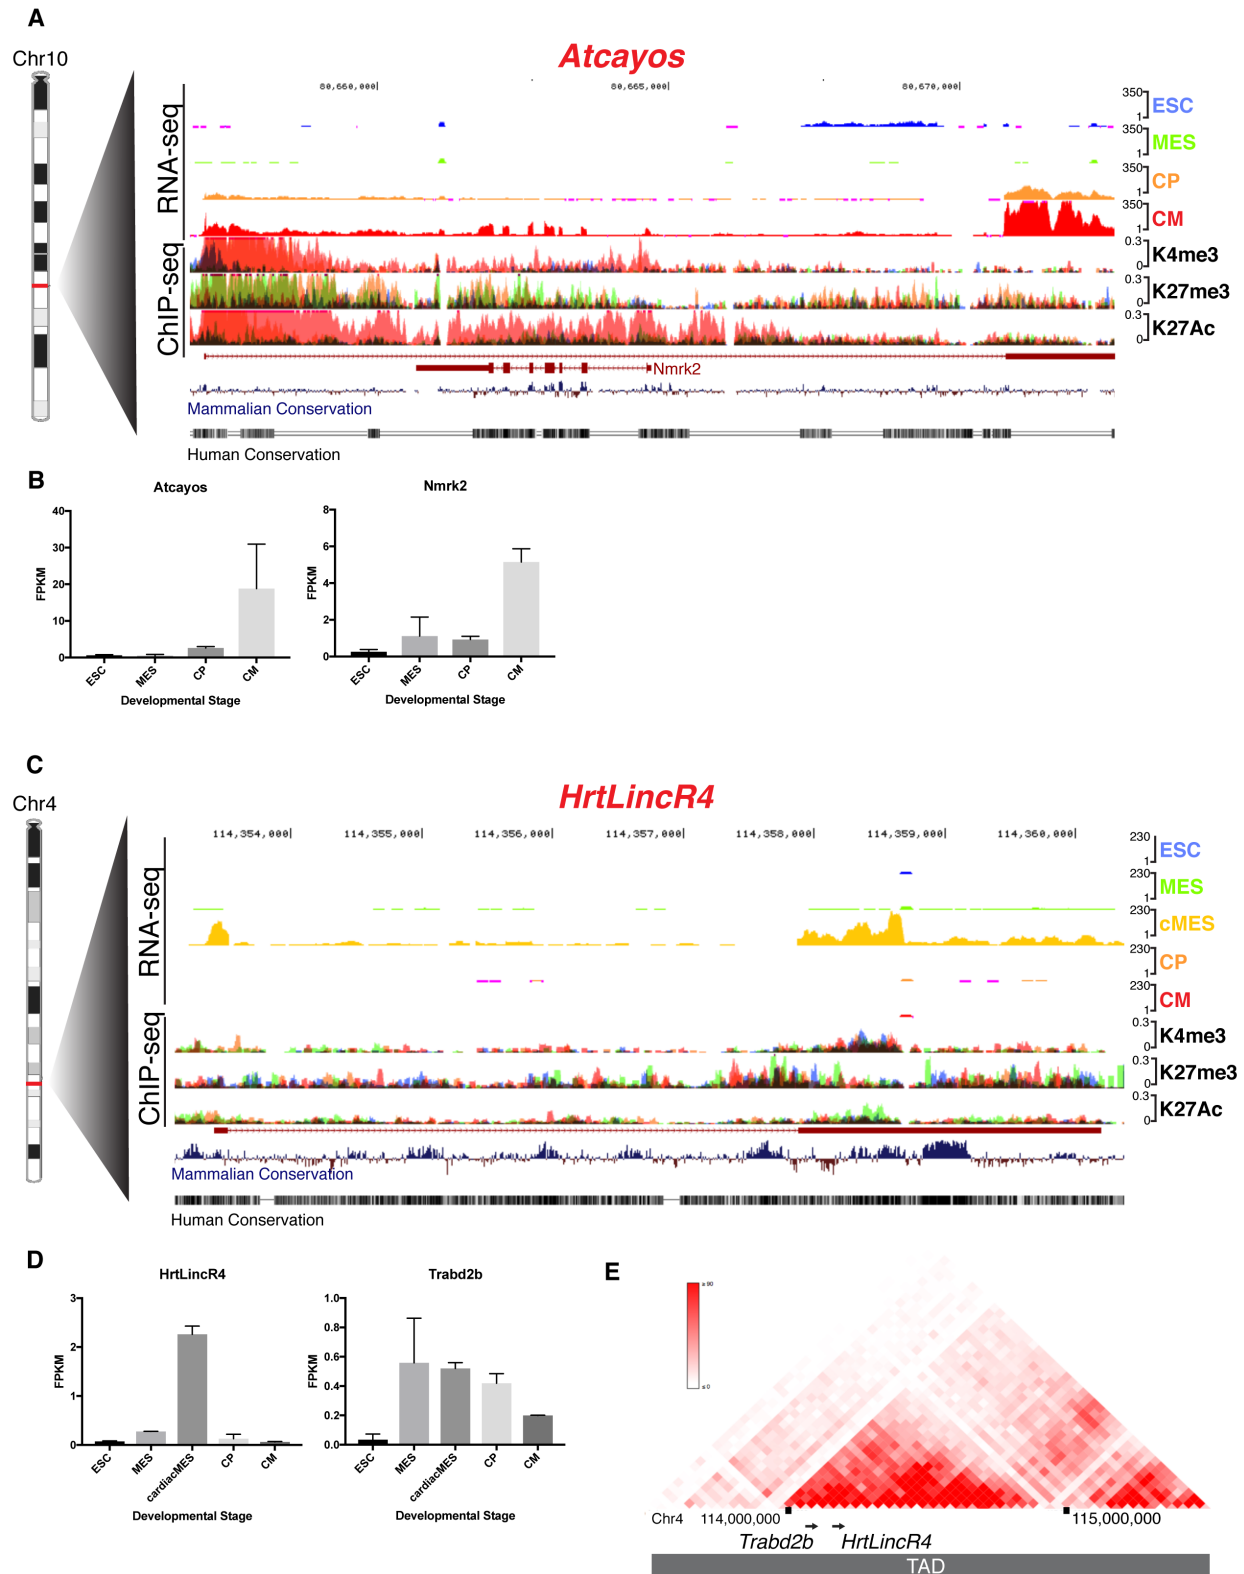

Supplemental Figure S3

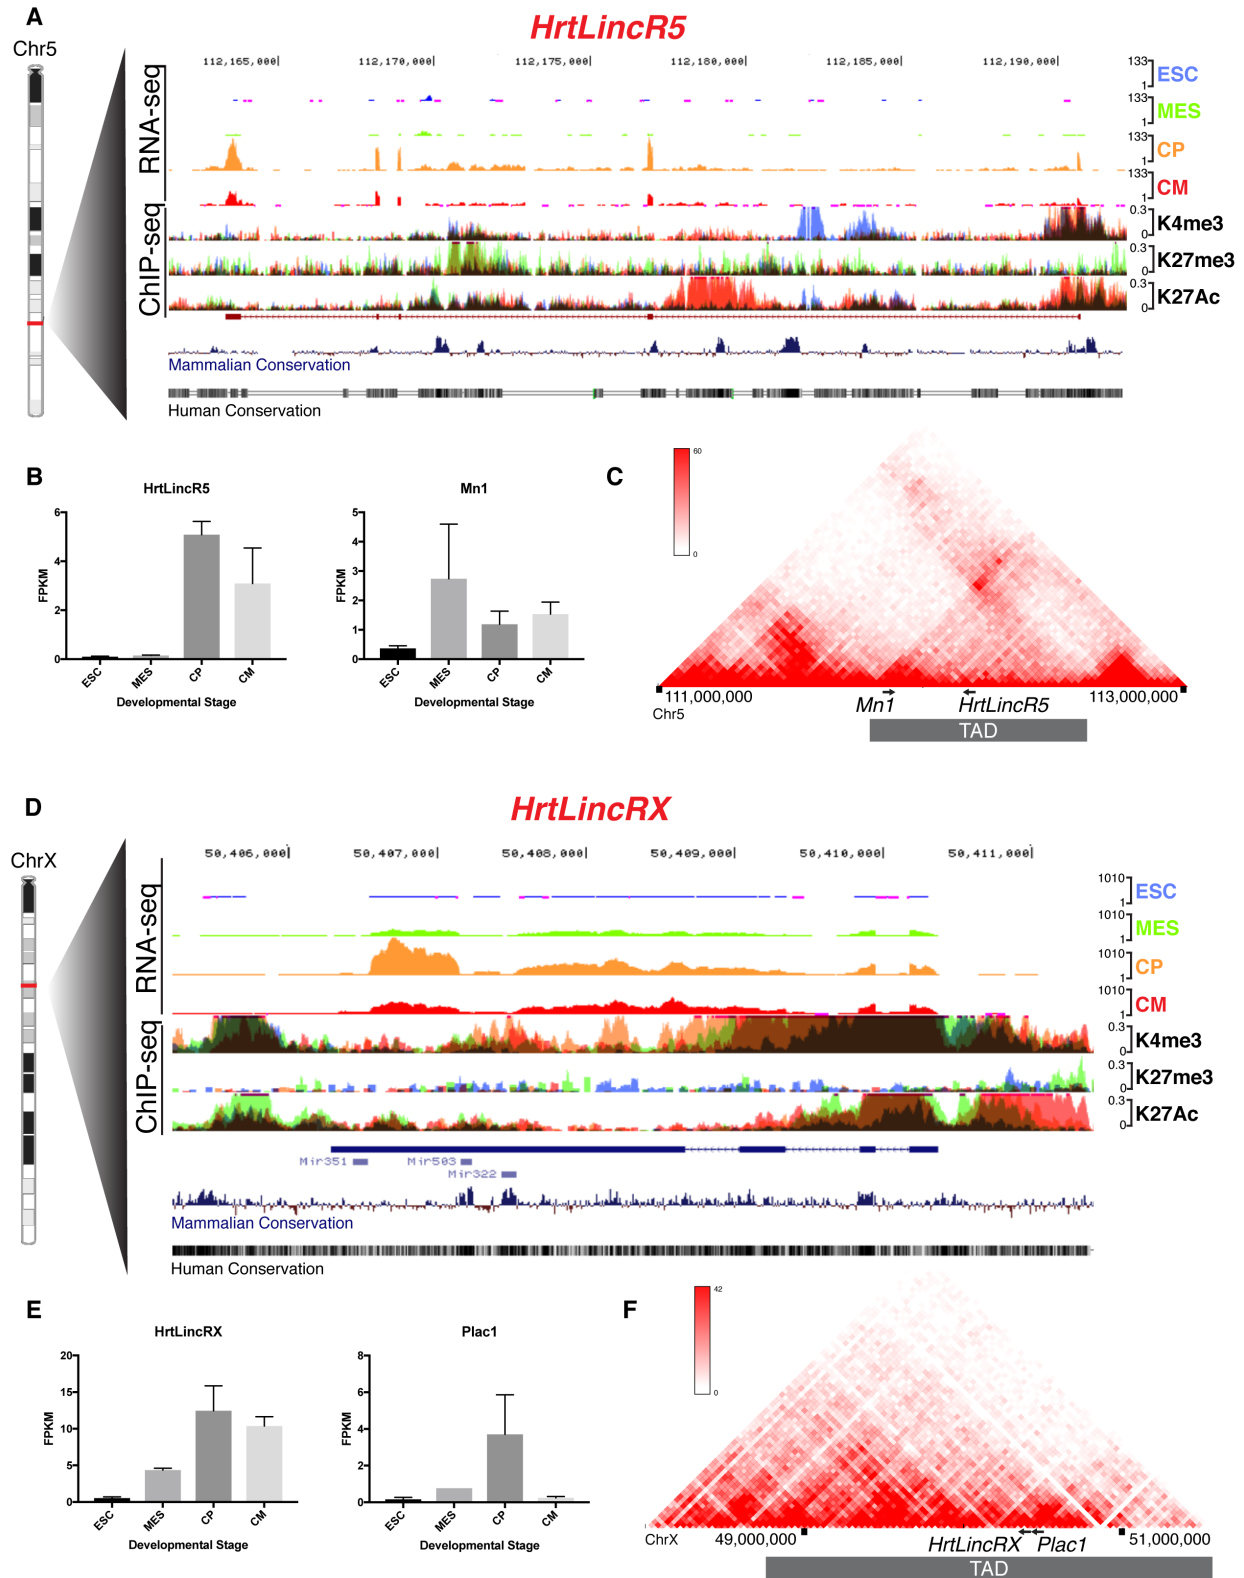

1088

## Supplemental Figure S4

**A**

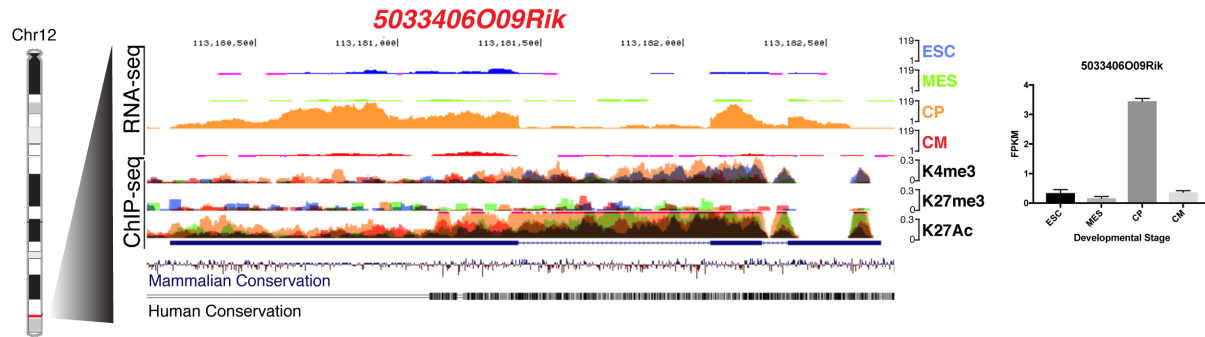

**B**

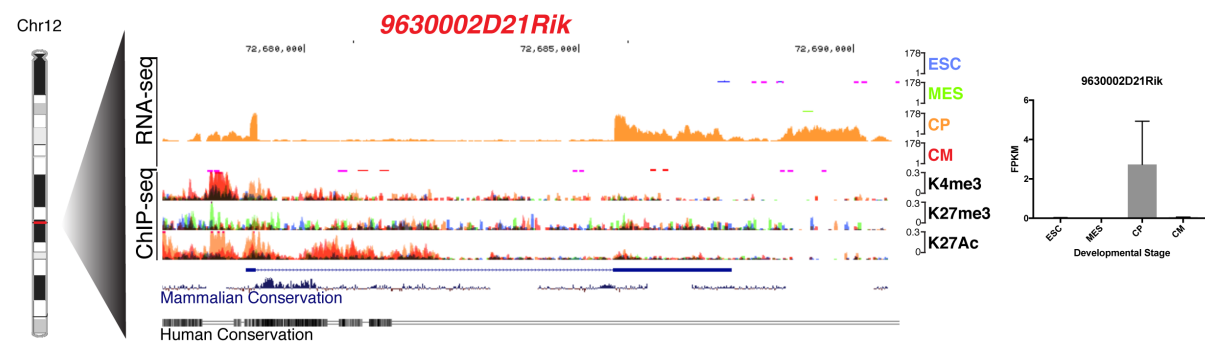

**C**

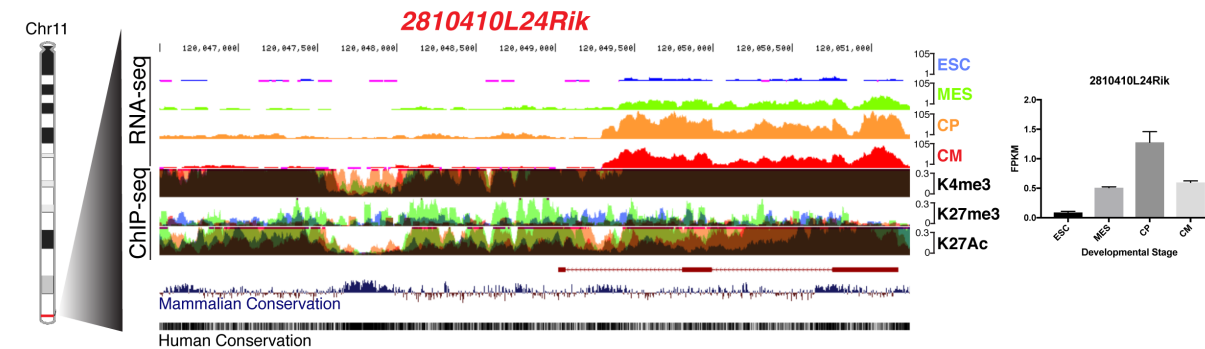

Supplemental Figure S5

**A**

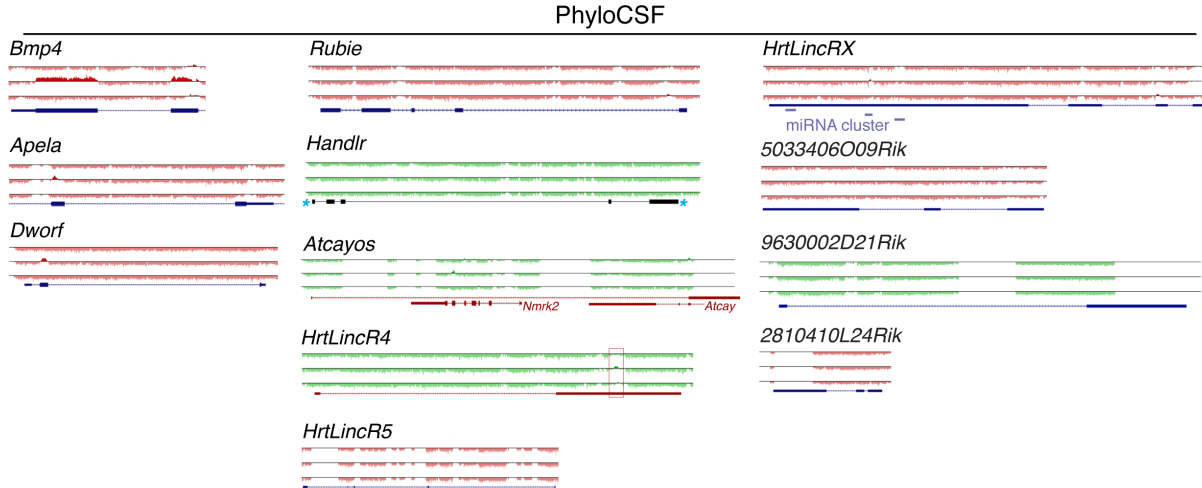

**B**

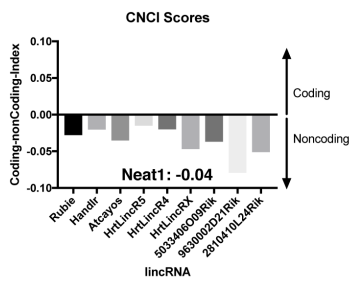

**C**

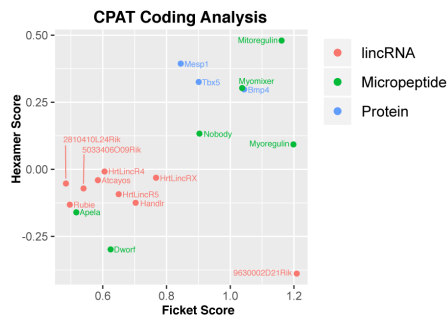

**D**

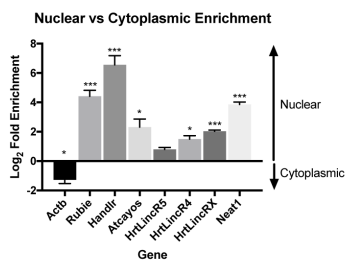

**E**

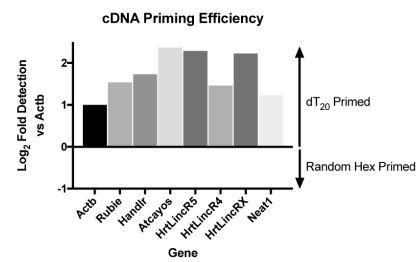

## Supplemental Figure S6

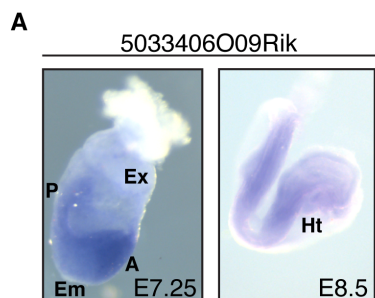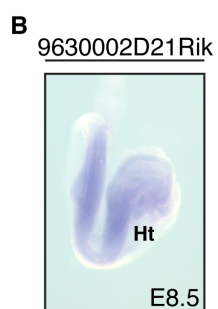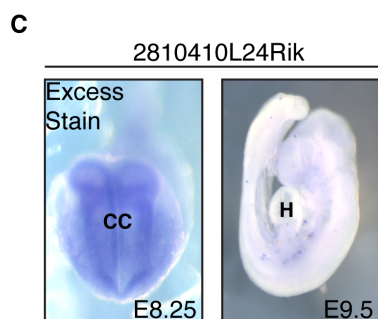

## Supplemental Figure S7

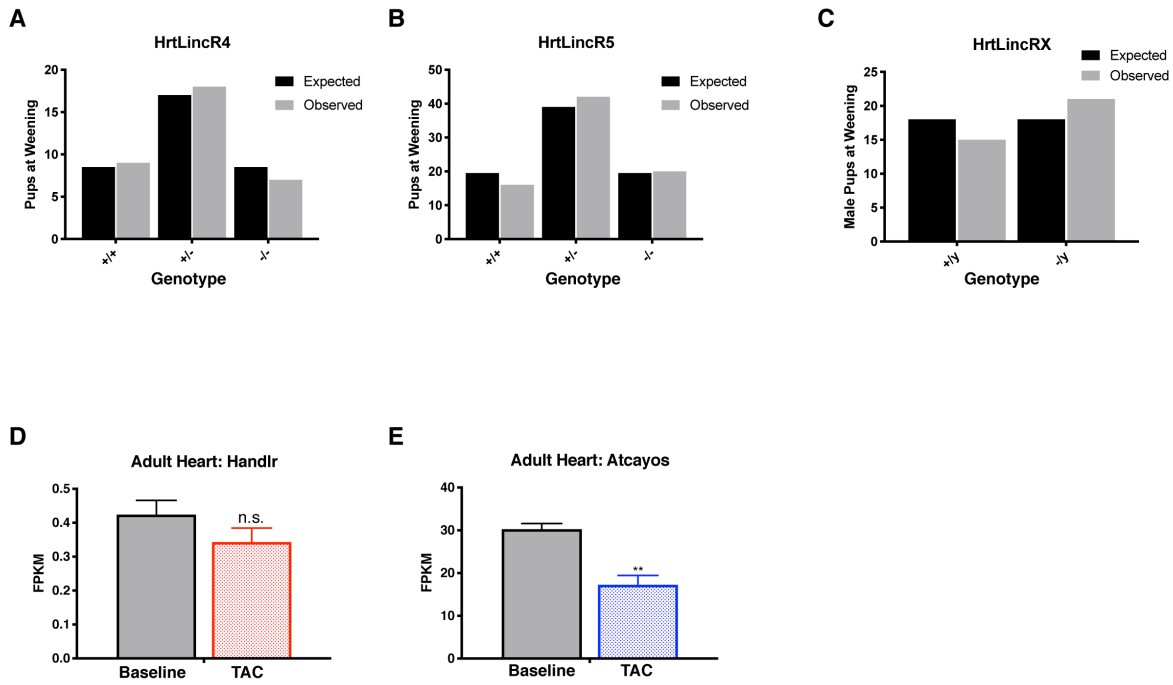



Supplemental Figure S8

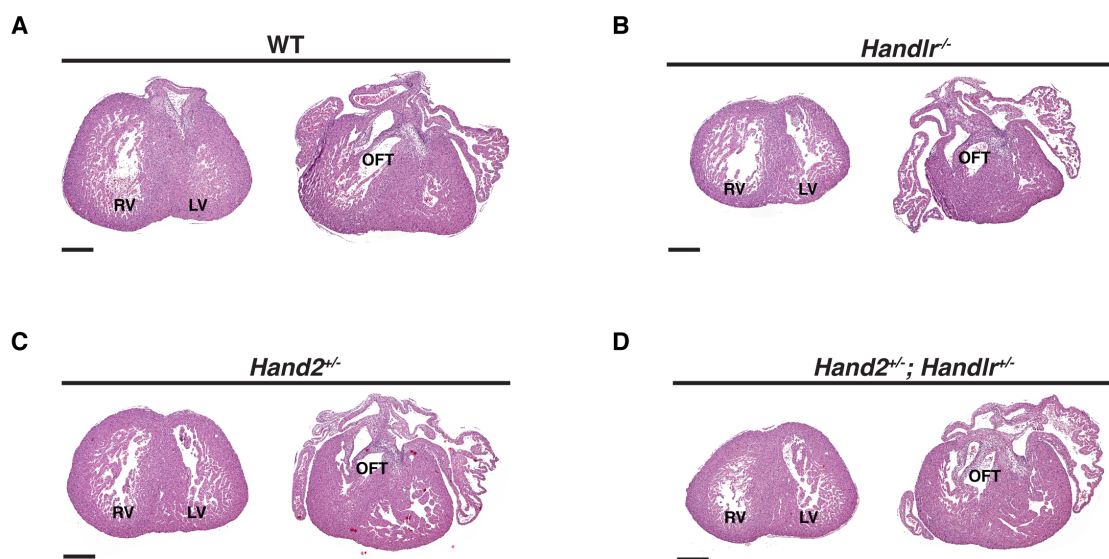

Supplemental Table S1. RT-qPCR primers

| Target           | Forward Primer        | Reverse Primer          | Product Size (bp) |
|------------------|-----------------------|-------------------------|-------------------|
| <i>Handlr</i>    | CTGTGGGTCTCAGTAGGGAC  | TTTTGATTTTCCCCGCCCTG    | 101               |
| <i>Rubie</i>     | CTGCTTCCTCCTCTTCGTGT  | CCAAATGCTTCAGTTCCCCT    | 90                |
| <i>Atcayos</i>   | CCCAGTCGTTGAAGAGGAGT  | TTCACTTCCCACCCCATCTC    | 126               |
| <i>HrtLincR4</i> | TCTACAACCACAGTCAGCCC  | CTGAGATATCCCCGCCTGAG    | 113               |
| <i>HrtLincR5</i> | CCAGCAGCACCAACCAATA   | AGACGGTGGACCCTTTTCTT    | 94                |
| <i>HrtLincRX</i> | CTTAAGGAGTGGGGCTGTTAT | AATGATCCAGTGCTAACATATGC | 78                |
| <i>Hand2</i>     | CAGCTACATCGCCTACCTCA  | CTCCTCTTTCACGTCGGTCT    | 103               |
| <i>Bmp4</i>      | AGCCAACACTGTGAGGAGTT  | GGATGCTGCTGAGGTTGAAG    | 104               |
| <i>Nmrk2</i>     | GAAGACCACCCTGACCAACA  | CCCAGTGTAAAGCCGTCC      | 122               |
| <i>Trabd2b</i>   | TCGAGGACAGCACTACGATC  | CTGGAGTTGGTGTGAGGACT    | 101               |
| <i>Mn1</i>       | TGCCAGAACATGATTGCCAG  | GCTCAGTTTCTCTTCCCCT     | 90                |
| <i>Plac1</i>     | TACCAGTTTCACTACCGCGT  | ACAGGACACGGGAATCACAT    | 135               |
| <i>Neat1</i>     | CTGCACTGTAGATCGGGACC  | CTTTCCCCAACACCCACAAG    | 117               |

1100

1102 Supplemental Table S2. *in situ* hybridization probe primers

| Target               | Fwd Primer           | Rev Primer           |
|----------------------|----------------------|----------------------|
| <i>Handlr</i>        | GACTTGGATCTGTCTCGCCT | TCTGTCCCCGGAGTGTAGTA |
| <i>Rubie</i>         | CTCCCTGCTTCCTCCTCTTC | GTCCTGGTCATGGTCTGTCA |
| <i>Atcayos</i>       | GAGATGGGGTGGGAAGTGAA | ACCTTTACCTGCTGAGCCAT |
| <i>HrtLincR4</i>     | ACCGAGAGACAGCAGTTGAA | CCGCGAGTCCCTTTGTAATG |
| <i>HrtLincR5</i>     | TATGGGGATGGGAACTCAGC | AGGATGAACGGAGAAGCACA |
| <i>HrtLincRX</i>     | ACCGCTCCAACCCGATTC   | GCTCCCACTGTTGCTTTTCA |
| <i>5033406O09Rik</i> | CCCACTCTCTGCTGATCCAA | AGCCCCGTTTCTTCTTCTGA |
| <i>9630002D21Rik</i> | AGGATGAACGGAGAAGCACA | GCCTTCTTCCTCCTCTGGTT |
| <i>2810410L24Rik</i> | CTCACATCCTGTTCTGGGGT | AACATCCCGTGCTGTAAAGC |

1104

Supplemental Table S3. tru-sgRNA oligomers

| Target           | Left Cut                                 | Right Cut                                |
|------------------|------------------------------------------|------------------------------------------|
| <i>Handlr</i>    | AATGATGGTCATCCACCG<br>TTAAAAGAAGGCCCCGG  | CCTAATAAGATGCCTGAC<br>CCTTCTCATTGAAACCCC |
| <i>Rubie</i>     | GGGCTAAATAACCCATTA                       | GATTAATTCATGCCCCGG                       |
| <i>Atcayos</i>   | CAACCCGCTTTAAACTCC<br>CTCATAACTTGGGGTGTC | GACCAGCATCAGAGTCAC<br>ACCCGCCTGGTGAGCCGA |
| <i>HrtLincR4</i> | GGTTCAGGCAGGAATAC                        | GGGGACAGCCTTTACAA                        |
| <i>HrtLincR5</i> | GTGATAGACCACTTCTTG                       | GCGCCCCATCCGTATGC                        |
| <i>HrtLincRX</i> | GGCCATTTTGACCCGTCG                       | GGCGGTCCACTTTAGGGG                       |

1106

1108 Supplemental Table S4. Genotyping primers

| Locus                | Fwd Primer                                      | Rev Primer                                   | WT band size (bp) | KO band size (bp)      |
|----------------------|-------------------------------------------------|----------------------------------------------|-------------------|------------------------|
| <i>Handlr</i>        | TGGATCCAACCTAACCTAATGCTT                        | ACGCGCAGGAAAGGTAAAT<br>CCGCATTAGTTCCCTTCCC   | 600               | 400                    |
| <i>Rubie</i>         | CCTGGTTGCCGTCATTAAGT                            | GTGTATGTGGGCAGAGAGGT<br>AGTCACTGTTTCGCATGAGA | 617               | 680                    |
| <i>Atcayos</i>       | TGACGACAGCTGATAGGGC                             | TGCTTGCCCTAGTATGGTCA<br>AGTTCCATCTTCAAGGCCCT | 443               | 280                    |
| <i>HrtLincR4</i>     | ATCTTGGGGCCATCTCCAAA                            | GACAATTGGCTGTGGTGGTT<br>TTTCTCTGGACCCGTGTGAG | 448               | 500                    |
| <i>HrtLincR5</i>     | GTAAAGGCTCTTGTACAGGG                            | TTTTCTTGCAACTCCCAGC<br>TAACTAGAGGGAGGGGAGGG  | 255               | 180                    |
| <i>HrtLincRX</i>     | AGGAGAGAGAAAAGCCGTGT                            | CGCGGTGCAATGAAAGACTA<br>GGGCCACTCATTTGTAAGCA | 784               | 855                    |
| <i>Bmp4 (loxP)</i>   | GAGCTAAGTTTTGCTGGTTTGC                          | GCCCATGAGCTTTTCTGAGA                         | 200               | 250 (loxP)             |
| <i>Cre Transgene</i> | ATGCTTCTGTCCGTTTGCCG                            | CCTGTTTTGCACGTTACCG                          | 280               |                        |
| <i>Hand2 (loxP)</i>  | AAAGAGTCAGTGGTTCTCATCC<br>GAAGTTCCTATTCTCTAGAAA | AATCTAACCCAACCCCTCGC                         | 600               | 634 (loxP)<br>300 (KO) |

1110

Supplemental Table S5. *Handlr* KO TAC echocardiography

1112

| Time Point                    | <i>Handlr</i> <sup>+/+</sup> |              |              |              |              | <i>Handlr</i> <sup>-/-</sup> |              |              |              |              |
|-------------------------------|------------------------------|--------------|--------------|--------------|--------------|------------------------------|--------------|--------------|--------------|--------------|
|                               | Baseline                     | Week 1       | Week 4       | Week 6       | Week 8       | Baseline                     | Week 1       | Week 4       | Week 6       | Week 8       |
| ENDOarea;d (mm <sup>2</sup> ) | 16.21±0.71                   | 16.26±1.19   | 16.65±1.42   | 16.19±1.58   | 17.35±1.63   | 14.00±0.70                   | 14.63±0.29   | 15.39±1.16   | 15.65±0.49   | 16.05±1.09   |
| ENDOarea;s (mm <sup>2</sup> ) | 10.07±0.45                   | 11.82±1.15   | 12.59±1.10   | 12.30±1.17   | 13.35±1.36   | 7.51±0.53                    | 9.72±0.35    | 10.68±1.25   | 11.38±0.27   | 12.45±1.04   |
| IVS;d (mm)                    | 0.64±0.04                    | 1.02±0.05    | 0.90±0.06    | 1.12±0.06    | 1.20±0.08    | 0.63±0.04                    | 0.93±0.04    | 1.13±0.04    | 1.05±0.07    | 1.29±0.06    |
| IVS;s (mm)                    | 0.96±0.04                    | 1.38±0.04    | 1.16±0.08    | 1.25±0.05    | 1.39±0.05    | 0.91±0.02                    | 1.28±0.07    | 1.33±0.06    | 1.28±0.05    | 1.46±0.11    |
| LVID;d (mm)                   | 4.54±0.10                    | 4.38±0.16    | 4.65±0.19    | 4.58±0.24    | 4.68±0.19    | 4.19±0.09                    | 4.25±0.04    | 4.49±0.18    | 4.57±0.06    | 4.43±0.13    |
| LVPW;d (mm)                   | 0.66±0.05                    | 1.00±0.05    | 1.03±0.11    | 1.22±0.07    | 1.13±0.04    | 0.61±0.04                    | 0.89±0.09    | 0.93±0.09    | 1.03±0.05    | 1.11±0.05    |
| LVPW;s (mm)                   | 0.82±0.06                    | 0.97±0.06    | 1.26±0.10    | 1.52±0.07    | 1.37±0.07    | 0.87±0.05                    | 1.09±0.12    | 1.32±0.22    | 1.37±0.12    | 1.25±0.06    |
| Doppler (mm/s)                |                              | -3665±206    |              |              |              |                              | -3671±209    |              |              |              |
| HR (bpm)                      | 511.23±16.33                 | 513.64±11.34 | 512.55±28.10 | 506.11±26.13 | 545.55±29.02 | 470.08±12.68                 | 493.20±21.93 | 492.34±24.46 | 476.12±30.90 | 498.91±19.11 |
| Body Weight (g)               | 28.30±0.76                   | 26.70±0.41   | 28.57±0.70   | 29.87±0.73   | 31.00±0.53   | 28.70±1.49                   | 27.96±1.74   | 28.44±1.19   | 30.00±1.52   | 29.60±1.03   |
| LV Mass (mg)                  | 110.68±6.06                  | 191.11±17.75 | 198.85±27.89 | 252.14±24.46 | 257.60±24.23 | 90.33±4.89                   | 156.06±12.16 | 201.37±11.15 | 209.86±11.13 | 245.80±19.90 |
| FAC (%)                       | 37.78±1.55                   | 27.93±3.16   | 24.25±2.52   | 23.85±1.96   | 23.38±1.37   | 46.50±1.70                   | 33.50±2.68   | 31.45±4.94   | 27.06±2.83   | 22.50±3.65   |

1114

1116 Supplemental Table S6. *Atcayos* KO TAC echocardiography

1118

| Time Point                    | <i>Atcayos</i> <sup>+/+</sup> |              |              |              |              | <i>Atcayos</i> <sup>-/-</sup> |              |              |              |              |
|-------------------------------|-------------------------------|--------------|--------------|--------------|--------------|-------------------------------|--------------|--------------|--------------|--------------|
|                               | Baseline                      | Week 1       | Week 4       | Week 6       | Week 8       | Baseline                      | Week 1       | Week 4       | Week 6       | Week 8       |
| ENDOarea;d (mm <sup>2</sup> ) | 12.95±0.65                    | 15.66±1.10   | 14.89±0.89   | 15.09±1.57   | 16.15±1.51   | 14.95±1.70                    | 15.21±0.94   | 14.44±0.97   | 14.17±1.26   | 15.74±1.20   |
| ENDOarea;s (mm <sup>2</sup> ) | 8.11±0.43                     | 10.15±0.94   | 10.71±0.84   | 11.02±1.52   | 12.47±1.38   | 8.90±0.86                     | 9.95±0.81    | 10.22±0.87   | 10.65±1.25   | 12.27±1.30   |
| IVS;d (mm)                    | 0.77±0.03                     | 1.05±0.06    | 1.08±0.05    | 1.03±0.04    | 1.08±0.05    | 0.62±0.04                     | 0.90±0.09    | 1.01±0.04    | 0.99±0.05    | 1.14±0.07    |
| IVS;s (mm)                    | 1.01±0.06                     | 1.42±0.07    | 1.32±0.06    | 1.30±0.04    | 1.39±0.06    | 0.83±0.04                     | 1.33±0.05    | 1.25±0.07    | 1.18±0.05    | 1.31±0.05    |
| LVID;d (mm)                   | 4.01±0.09                     | 4.32±0.15    | 4.47±0.14    | 4.47±0.19    | 4.45±0.20    | 4.25±0.09                     | 4.22±0.15    | 4.33±0.16    | 4.24±0.17    | 4.52±0.16    |
| LVPW;d (mm)                   | 0.82±0.04                     | 1.05±0.05    | 1.09±0.04    | 1.17±0.07    | 1.21±0.06    | 0.60±0.04                     | 0.93±0.05    | 1.14±0.04    | 1.21±0.09    | 1.12±0.07    |
| LVPW;s (mm)                   | 0.99±0.06                     | 1.24±0.06    | 1.36±0.06    | 1.36±0.03    | 1.37±0.05    | 0.77±0.05                     | 1.14±0.07    | 1.35±0.06    | 1.35±0.08    | 1.33±0.05    |
| Doppler (mm/s)                |                               | -3457±174    |              |              |              |                               | -3509±210    |              |              |              |
| HR (bpm)                      | 485.01±22.77                  | 513.39±13.83 | 520.69±15.65 | 510.88±18.73 | 538.68±13.28 | 451.29±34.10                  | 515.49±7.01  | 555.15±17.93 | 513.05±19.75 | 527.46±29.90 |
| Body Weight (g)               | 28.37±0.77                    | 27.40±0.51   | 28.50±0.74   | 29.31±0.59   | 29.44±0.47   | 27.36±0.81                    | 26.41±0.63   | 27.26±0.74   | 28.31±0.82   | 29.29±0.84   |
| LV Mass (mg)                  | 117.88±7.48                   | 195.39±16.13 | 216.98±14.07 | 221.22±19.53 | 234.12±20.87 | 91.61±3.64                    | 154.58±11.35 | 202.07±11.93 | 203.23±18.00 | 234.41±22.46 |
| FAC (%)                       | 37.41±0.66                    | 35.60±1.93   | 29.18±2.09   | 27.98±2.40   | 23.47±2.09   | 40.13±1.73                    | 34.66±2.63   | 29.59±2.08   | 25.66±3.29   | 22.75±3.03   |
